# Supplementary material for: Tumor stiffening reversion through collagen crosslinking inhibition improves T cell migration and anti-PD-1 treatment
Source: eLife. 2021 Jun 9;10:e58688. doi: 10.7554/eLife.58688 (PMC8203293; doi:10.7554/eLife.58688)
Supplement: Figure 1—source data 1. [file elife-58688-fig1-data1.xlsx]

## Sheet: Figure 1A
EGI-1			KPC			MMTV-PyMT			mPDAC			MET-1
Volume	Stiffness		Volume	Stiffness		Volume	Stiffness		Volume	Stiffness		Volume	Stiffness
68.85	15.9		40.3065	9.3		25.8515	18		416	14.4		131.584	6.8
263.786	7.34		219.6	19.7		57.132	31.7		600	9.1		120.787	10.6
261.121	11.3		748.503	20.2		105.153	14.7		62.5			78.03	3.6
56.144	12.6		1303.05	48.1		57.12	13.9		526.5	25		75.106	4.4
137.677	7.79		44.764	4.74		38.8725	11.4		726	15.6		142.97	10.4
176.4	9.5		443.76	10.4		304	12.9		600	3.2		218.295	18.6
278.4	12.5		740.664	19		41.5438	9.8		445.5	10.6		142.956	4.9
431.664	16.9		907.5	16.7		76.176	27.8		135	25.9		174.08	8.9
537.824	18.4		32	5.31		58.4174	14.1		405	10.6		404.6	15.9
96.228	8.57		286.688	14.9		23.5249			650	8.7		526.5	9.5
244.688	34.7		473.344	20		107.102	13.5		364.5	8.1		220.5	12.4
239.447	10.6		660	15.4		31.3331	21.6		125	14.2		242.76	13.4
418.968	26.6		941.92	25.7		66.3515	21		352	8.5		36.75	5
581.042	24.8		133.28	12.1		109.83	20.5		180	3.4		80.64	3.2
597.861	24		352.872	31.8		29.8803	21		318.5	9.4		48	2.2
49.923	11.8		487.142	28		41.5522	19.2		320	4.7
114.464	11.9		1041.15	34.3		77.112	17.9		220.5	7.9
156.6	13.7		1723.48	33.4		708.295	36.5		416	5.4
220.5	13.1		57.0375	7.42		490.812	33.4		269.5	6.5
273.8	15		518.938	19.4		695	33.8		245	6.1
59.904	9.37		691.014	25.7		12.0914	7.1		416	13.1
126.514	6.75		900.422	24.3		54.3325	17.2		245	16.2
178.024	9.97		152.626	14		154.791	19.1
223.391	19.8		447.536	17.1		19.3368	21
362.404	17.5		730.08	17.7		42.0967	20.4
610.018	18.6		1478.06	45.5		57.2927	22.3
53.235	7.73		57.132	3.95		20.5408	24.9
253.127	14.2		188.442	9.32		42.194	22.3
211.25	18.7		413.526	17.4		65.9549	23.3
480.632	30.1		445.5	17.5		108.083	12.7
571.438	32.5		45.36	4.6		201.84	8.6
890.624	40.3		259.611	12		287.766	26.2
72.03	15.9		409.248	30.3		8.03682	9.9
212.544	24.8		496.008	16.7		15.2286	11.4
347.612	33.6		676.26	44.8		317.68	28.3
720	38.6		77.44	3.83		114.626	19.9
62.208	12.2		276.606	24.2		210.7	11.5
161.792	11.5		391.682	25.8		90.1372	13.5
207.831	16		467.2	20.8		28.2151	22.5
67.5	3.94		1140.47	53.3		47.4375	30.4
149.504	7.81		29.3105	12.8		77.1282	16.9
203.35	13.4		93.896	8.74		126.053	26.5
50.625	6.78		190.512	21.1		266.062	30.7
205.768	8.85		361.6	8.34		589.824	19
244.488	16		445.5	43.8		37.4817	7.1
69.696	13.1		215.296	23.7		49.284	26.1
233.928	14.4		691.2	48.4		130.103	14.9
299.218	9.81		281.627	25		48.7969	25.4
37.544	12.5		308.93	21.8		43.0384	13.4
164.255	17.4		328.536	29.5		84.8556	17.6
249.444	16.7		805.752	74.3		53.9908	17.6
43.32	13.2		199.962	22.9		113.081	17.8
143.65	6.06		647.149	48		129.762	16.6
103.488	7.31		229.84	12.2		31.7944	21.6
242.592	15.1		316.875	18.2		49.4714
317.52	14.5					118.076	13.5
472.723	17.6					227.691	24
58.4895	11.9					65.7181	9.1
84.2141	9.04					225.651	27.2
142.2	13.5					160.019	24.6
224.45	20					207.965
277.478	14.3					35.5776	15.8
288.297	19.7					137.417
52.65	11.1					240.186	21.4
105.8	4.8					456.23	18.3
114.376	11.9					82.8113	18.6
260.876	12.1					63.2478	26.4
279.864	17.7					35.6375	20.7
469.731	30.2					32.3203	32.9
70.227	5.2					195.195	41.4
117	6.41					8.85606	14.7
121.055	7.04					38.1909	17.6
208.088	6.09					97.6941
255.881	7.55					240.811	24.2
393.348	12.3					144.984	17.1
392.089	20.5					46.109	22
59.048	7.6					83.0374	16.9
56.3135	9.04					162.324	22.1
62.208	9.48					55.1105	17.2
254.634	10.2					228.881	32.8
337.662	18.8					36.9612	20.9
381.024	16.6					64.2253	12.1
485.98	36.9					103.902	13.4
31.2375	5.8					117.526	13.6
48.51	11.1					138.999	15.6
62.208	13					155.787	26.7
150.282	11.1					358.026	21
176.418	7.46					20.9587	15
196.599	11.4					41.7143	22.3
272.281	27					69.2576	24.4
37.6	5.5					144.858	10.6
53.6625	7.76					103.24	10.9
130.977	8.87					33.5965	14.3
159.359	9.03					259.078	19.6
277.724	13.3					51.6111	9.6
325.424	15.4					9.56642
406.272	17					50.8584	12.6
50.1187	7					78.0254	21.3
59.7375	3.41					48.8106	8.8
57.132	6.65					62.1129	15.5
116.058	4.26					52.0243	22.2
210.938	10.2					125.451	18.6
233.928	14.2					40.8389	21.5
206.681	20.4					72.5032	23.6
						161.331	14.2
						210.859	18.9
						170.218	17.7
						354.375	18.5
						842.533	29.3
						98.8774	11.5
						34.224	16.6
						77.6597	13.4
						18.9922	12
						13.5369
						24.5188	14.3
						43.4277	18.1
						21.2832	20.5
						31.7553	19.3
						46.8975	28.6
						51.0213	29
						374.998	47
						161.792	41.7
						116.058	30.8
						509.085	29.4
						28.0641	28.1
						25.872	26.5
						22.3824	23
						16.9062	21.5
						6.51976	20.7
						215.016	19.3
						46.625	19.1
						21.689	19.1
						160.846	18.5
						39.0015	18.2
						58.121	18.2
						66.3995	17.4
						16	17.1
						64.2622	15.9
						96.0915	14.9
						27.9608	14.9
						8.2	14.7
						42.187	14.7
						94.1184	14.1
						100	13.8
						89.1	13.5
						433.491	13.4
						1.25503	12.5
						10.051	12.3
							11.7
						20.354	11.2
						2.30323	10.8
						6.3945	10.4
						48.4557	10.3
						1.95625	10.3
						3.9375	9.9
						4.55218	8
						11.7837	7.9
						10.7702	7.2
						1.57257	7.2
						16.8438	5

## Sheet: Figure 1b
EGI-1			KPC			MMTV-PyMT			mPDAC			MET-1
Volume	% tumor area > 40kPa		Volume	% tumor area > 40kPa		Volume	% tumor area > 40kPa		Volume	% tumor area > 40kPa		Volume	% tumor area > 40kPa
239.447	20.7524		723.482	39.1167		41.5522	0		416	0.0940682		211.805	0
418.968	15.6803		903.049	20.686		57.132	29.4176		600	0		22.5847	0
581.042	16.8103		941.92	21.1862		490.812	35.0622		526.5	0.503778		214.968	0
597.861	33.707		907.5	6.00764		38.8725	0		726	0.904177		196.03	0
156.6	0		445.5	44.5409		41.5438	0		600	0		30.0194	0
220.5	0		676.26	52.4246		54.3325	3.2629		445.5	0		54.9475	0
273.8	0		940.468	38.8327		42.0967	0		562.5	8.7706		98.5055	1
413.34	9.05876		445.5	3.11924		66.3515	1.32735		331.457	11.0938		105.358	0
178.024	0		978.057	10.9791		47.4375	0		175.172	0		9.48244	0
223.391	0		60.912	0		42.194	0		17.0912	0		57.9114	0
362.404	0		205.204	0		266.062	22.465		228.15	1.07599		12.2539	0
610.018	1.11165		264.192	0		201.84	0		19.487	0		10.3518	0
264.654	0		347.897	0		49.284	9.82071					62.2895	0
451.25	0		380.894	0		15.2286	0					50.8385	0
520.251	0		781.488	0		43.0384	0					180.978	0
796.544	8.90676		518.938	5		210.7	0					223.821	1
336.82	0		691.014	2		113.081	0					222.621	0
567.582	6.04556					105.153	0					228.292	0
733.824	5.50703					76.176	17.8964					141.209	0
907.924	55.1926					304	0					239.599	0
344.452	0					107.102	0					80.2438	1
1104.42	3.45517					109.83	0.297177					94.5422	0
939.87	2.21084					57.2927	0					314.628	0
1105.92	4.65136					154.791	0.0370073					714.38	0
176.4	0					695	26.6581					637.145	5
278.4	0					77.112	1.09851					742.808	2
431.664	8.20682					65.9549	5.65818					91.7356	0
537.824	4.78655					77.1282	0					82.3	0
211.25	0					589.824	0					89.6029	1
480.632	20.6367					130.103	0					454.548	0
571.438	28.3704					287.766	13.8603					92.7259	0
890.624	48.5778					317.68	9.04965					141.488	0
347.612	0					312.184	8.03062					162.694	0
429.3	33.169					90.1372	0					389.759	1
720	5.94583					129.762	0					419.311	0
836.37	42.3468					84.8556	0					337.164	0
