# Supplementary material for: Tumor stiffening reversion through collagen crosslinking inhibition improves T cell migration and anti-PD-1 treatment
Source: eLife. 2021 Jun 9;10:e58688. doi: 10.7554/eLife.58688 (PMC8203293; doi:10.7554/eLife.58688)
Supplement: Figure 2—source data 1. [file elife-58688-fig2-data1.xlsx]

## Sheet: Figure 2a
EG1-1
Days	Control								BAPN
10	1	1	1	1	1	1	1	1	1	1	1	1	1	1	1	1
12	0.459091	0.759664	0.432432	1.23269	1.18947	1.91379	1.41091	0.487143	0.916418	1.8871	1.825	1.1413	0.807042	2.23457	0.660331	0.949484
15	0.553788	1.13445	1.07207	1.35385	1.24737	2.24138	1.61273	0.95	0.773134	1.03387	1.3	1.5	0.871831	0.77284	0.655372	1.71134
19	1.14394	1.68067	1.09009	1.17115	1.34211	1.91379	1.64182	0.608571	1.19851	0.932258	1.90833	1.07609	1.14648	0.738272	0.933884	1.39175
22	1.09848	1.20168	1.59459	1.45192	2.47368	1.28621	2.41818	1.45714	1.29851	0.704839	1.48333	0.688044	1.00986	1.64197	0.709091	2.02062
26	1.33333	1.65546	2.72072	2.36538	2.18421	1.96552	2.8	2.02857	2.25373	2.45161		0	1.33803	0	0	2.04124
30				3.94231	4.85526	4.65517	3.09091	2.91429		2.35484		1.68478	2.64789	2.54321	1.10744	1.82474
KPC
Days	Control										BAPN
23	1	1	1	1	1	1	1	1	1	1	1	1	1	1	1	1	1	1	1	1
29	2.11828	2.19409	2.80603	2.6281	2.61456	1.22143	2.35949	2.6087	6.31854	0.682813	3.8172	2.47663	1.27879	2.45299	0.480667	0.979508	2.8327	1.75564	1.30263	1.28972
34	2.17204	4.00844	3.76648	2.31405	3.46361	1.26429	4.40506	6.58696	6.73629	1.64844	5.67204	1.90421	1.2303	1.84615	1.45333	3.04645	2.6616	1.44721	1.11184	1.51402
37	3.0215	5.63291	4.78343	2.83471	3.27493	1.82143	4.43038	3.63043	5.43081	2.99531	7.58064	1.46028	1.47273	0	1.43333	2.21312	2.8327	0	1.02632	1.26168
41		5.8	4.83993	4.76033	5.04043		5.4	9.73913	8.69452	7.42188	7.63441	0	0	0	1.18	1.02632	3.39924	0	1.02632	0.906542
MMTV-PyMT
Days	Control																																				BAPN
33	1	1			1	1	1	1		1	1	1	1	1	1	1	1	1	1		1	1	1	1	1	1	1	1	1	1	1	1	1	1	1	1	1	1	1	1	1	1	1	1	1	1	1	1	1
36	1.04945	1.33981			2.05357	1.11696	1.1037	1.19417		0.738609																											0.582857	0.753846		1.1677	1.47706	0.242236
39	1.84571	1.26154			1.49689	1.44037				1.77019	1.03106	1.04	1.15254	1.79474	1.05385	1.76667	1.78873	1.91892		1.2931			1.97638	1.34118	1.85926	1.91892			1.31461														0.956044	1.13592		1.36607	1.24327	1.12963	0.961165
42	1.77473	1.30097			1.41964	1.96433	1.37037	1.4466		0.705036		2.98901			0.784091	1.19728	1.28655			1.14706																	0.691429	1.15385	0.876254	0.614907	1.11009	0.751553
47																			1.20497		0.532663	1.20721					1.4	2.90972		1.62667	1.3125	2.52273	0.660465	1.0904	1.19167	1.39512			0.941463				0.625	1.7033	1.15443	1.14621		0.988304
55											2.3	2.33333		1.75263	1.58462		1.87324	3.18919	2.89441	4.96552	0.798995	1.53153	1.44094	1.51765	1.24444	3.18919	0.818182	1.64583	2.11236	0.706667	2.21875	2.11364	0.87907	0.649717	1.50833	1.41463							1.11111		1.15823	1.56818	1.64626	1.2924
mPDAC
Control	14.4	9.1	25.9	25	10.6	15.6	16.2
BAPN	4.7	4.3	5.4	6.5	13.1	6.1	3.2
MET-1
Days	Control					BAPN
9		0.5	0.5	4	0.5			4
12		62.9565	28.9	16.3995	15.548		0.5	31.046		22.5
15		58.2435	42.336	42	22.5837	39.2	4	52.65		50.43
19	131.584	120.787	78.03	75.106	36.75	123.93	19.6	162	156.8	194.56
22	142.97	218.295	142.956	174.08	80.64	276.85	31.581	327.665	273.8	113.75
26	404.6	526.5	220.5	242.76	48	487.688	100.602	526.5	364.5
[truncated: 11 more columns]

## Sheet: Figure 2b
EGI-1
	Control									BAPN
22	15.6803	0	0	0	6.04556	3.45517	0	20.6367	5.94583	0	0	0	0	0	0	0
26	16.8103	0	0	10	5.50703	8.21084	8.20682	28.3704	33.169	0	0.075305	1	0	0	0	0
30	33.707	19.0588	12.1116	18.9068	55.1926	14.6514	14.7866	48.5778	42.3468	0.181638	28.7912	19.4094	7.81874	2.31162	1.92803	8.58686
KPC
	Control										BAPN
34	3.11924	10.9791	19.5988	67.1748	23.9139	4.62475	12.7391				0	0	3.29561		0
37	19.5988	67.1748	23.9139	4.62475	12.7391	84.7844	0	68.6965	4.70588		0	0	0	0	3.29561
41	39.1167	20.686	21.1862	6.00764	19.5988	44.5409	52.4246	38.8327	68.6965	67.1748	7.94023	4.9772	7.30227	0.00772216	2.49012
MMTV-PyMT
	Control															BAPN
39	0		3.2629	1.32735	0.0370073	0	0	0	0	0	0	0	0	0	0	0	0	0	0	0	0	0	0	0	0
47	9.82071	29.4176	35.0622	0	0	3.2629	0	1.32735	0	0	22.465	0	0	0		0	3.61862	0	0	15.0525	0.211281	1.43815	0	0	1.05246
55	0		0	17.8964	0	0	30.2972	0	5.03701	26.6581	1.09851	5.65818	13.8603	9.04965	8.03062	8.77199	0	0.347144	0	0	0.315888	4.8178	0	0
mPDAC
Control	0.0940682	0	0.503778	0.904177	0	0	8.7706	11.0938	0	0	1.07599	0
BAPN	0	0	0	0	0	0	0	0	0	0	0	0
MET-1
	Control																				BAPN
19			3.2629	1.32735	0.0370073	0	0	0	0	0	0	0	0		0	0	0	0	0	0	0	0	0	0	0	0	0	0	0	0	0	0	0	0	0
22	0	1	0	0	0	3.2629	0	1.32735	0	0	2.46498	0	1.82071	0	0	0	0				0	0	3.61862	0	0	0	0	0	0	1.05246	0.211281	1.43815	0	0	1.05246
26			0	1.89638	0	0	3.29718	0	5.03701	2.65808	1.09851	0.658177	0	0	0	1.8603	2.04966	1.03062	0	0	0	0	0	0.347144	0	0	0	1.77199	0	0	0.315888	4.8178	0	0
