# Supplementary material for: Tumor stiffening reversion through collagen crosslinking inhibition improves T cell migration and anti-PD-1 treatment
Source: eLife. 2021 Jun 9;10:e58688. doi: 10.7554/eLife.58688 (PMC8203293; doi:10.7554/eLife.58688)
Supplement: Figure 3—source data 1. [file elife-58688-fig3-data1.xlsx]

## Sheet: Figure 3b
	EGI-1			KPC			MMTV-PyMT			mPDAC
	Control	BAPN		Control	BAPN		Control	BAPN		Control	BAPN
Number of values	68	65		54	62		40	50		52	47
Minimum	0.002936	0.008035		0.01193	0.6999		0.04733	0.03095		0.003445	0.1022
25% Percentile	0.283	0.6808		1.136	1.767		0.4875	0.2623		0.1953	0.4438
Median	0.7597	1.088		1.767	2.903		1.143	0.6502		0.3795	1.023
75% Percentile	1.577	2.317		2.414	3.963		2.942	1.889		0.812	1.974
Maximum	9.18	9.81		5.227	16.41		15.66	15.66		1.539	3.76
Mean	1.363	1.795		1.858	3.537		2.545	2.091		0.5012	1.211
Std. Deviation	1.822	1.889		1.131	2.959		3.313	3.506		0.3754	0.9091
Std. Error	0.221	0.2343		0.1539	0.3758		0.5239	0.4958		0.05206	0.1326
Lower 95% CI of mean	0.9216	1.327		1.549	2.785		1.485	1.095		0.3967	0.9445
Upper 95% CI of mean	1.804	2.263		2.167	4.288		3.604	3.088		0.6057	1.478
Sum	92.67	116.7		100.3	219.3		101.8	104.6		26.06	56.93
Mann Whitney test
P value	0.0602			< 0,0001			0.0683			< 0,0001
Exact or approximate P value?	Gaussian Approximation			Gaussian Approximation			Gaussian Approximation			Gaussian Approximation
P value summary	ns			***			ns			***
Are medians signif. different? (P < 0.05)	Yes			Yes			No			Yes
One- or two-tailed P value?	Two-tailed			Two-tailed			Two-tailed			Two-tailed
Sum of ranks in column A,B	3985 , 4926			2382 , 4404			2045 , 2050			1991 , 2959
Mann-Whitney U	1639			897			775			613

## Sheet: Figure 3c
	EGI-1			KPC			MMTV-PyMT			mPDAC
Orientation (°)	Frequency of fibers			Frequency of fibers			Frequency of fibers			Frequency of fibers
	Control	BAPN		Control	BAPN		Control	BAPN		Control	BAPN
-90	0.00970578	0.00673578		0.0130453	0.0177955		0.0101941	0.00742099		0.00577415	0.00801434
-88	0.00749667	0.0060416		0.00939834	0.0119143		0.00703357	0.00701118		0.0053821	0.00741536
-86	0.00928819	0.00716243		0.0103212	0.0117941		0.00810259	0.00676005		0.00577469	0.00807071
-84	0.0125985	0.00721603		0.0114375	0.0127926		0.00830717	0.00649864		0.00563252	0.0091056
-82	0.00955609	0.00772324		0.00944958	0.0122687		0.00953429	0.00644293		0.00549313	0.00868834
-80	0.010457	0.00700501		0.0096307	0.0145387		0.00976537	0.00738979		0.00589638	0.00821924
-78	0.0125866	0.00803479		0.00881658	0.0107742		0.00918603	0.00729748		0.00591248	0.00838151
-76	0.0107884	0.00830122		0.00948774	0.00950948		0.010322	0.00723002		0.00629983	0.00939466
-74	0.0111031	0.00847758		0.00937973	0.0095515		0.0134686	0.00641612		0.00653848	0.00940953
-72	0.00918034	0.00830233		0.00835634	0.0103119		0.0142666	0.00670795		0.00607546	0.0108793
-70	0.00923861	0.00848091		0.00844694	0.00940845		0.0149852	0.0069344		0.00651494	0.0104024
-68	0.0102549	0.00987363		0.00913116	0.00992674		0.0153338	0.00725176		0.00672696	0.0106947
-66	0.0103507	0.0112321		0.00854612	0.00978364		0.0168414	0.00822171		0.00652809	0.00910697
-64	0.010603	0.010171		0.00751432	0.00985254		0.0164103	0.00798037		0.00652082	0.0105576
-62	0.009827	0.0117949		0.00647319	0.00893896		0.0138762	0.00792055		0.00672047	0.0103894
-60	0.00792838	0.0118496		0.00614655	0.0103479		0.0128817	0.00817144		0.00827428	0.0102654
-58	0.0091	0.0126805		0.00654885	0.00974936		0.0157528	0.0085831		0.00818713	0.00946227
-56	0.00954214	0.0133963		0.00694989	0.00842192		0.0174501	0.00811036		0.00911426	0.0102309
-54	0.00970085	0.0137775		0.00721273	0.00877766		0.0218517	0.0085079		0.00881264	0.00981867
-52	0.0103557	0.015987		0.00656856	0.00908103		0.0263687	0.00785373		0.00826964	0.00993667
-50	0.00906545	0.0168212		0.00525261	0.00894301		0.0231725	0.0086797		0.0112304	0.00968283
-48	0.00854412	0.0150382		0.0052511	0.00851328		0.0200265	0.00856378		0.0129037	0.0120136
-46	0.009096	0.0149075		0.00487938	0.00910566		0.024223	0.0099599		0.0134578	0.0122958
-44	0.00836225	0.0174587		0.00415879	0.00916488		0.0271183	0.0104266		0.0135242	0.0112626
-42	0.00711963	0.0185875		0.00435016	0.00853522		0.0256002	0.0118694		0.0157986	0.0122275
-40	0.0079655	0.0170175		0.0049061	0.00922507		0.0242948	0.0125968		0.0205246	0.0134091
-38	0.00809766	0.016571		0.00531799	0.00932209		0.0194323	0.0119582		0.0263488	0.0119923
-36	0.00799302	0.0169035		0.00483116	0.00923916		0.0190574	0.0110287		0.0230978	0.0129934
-34	0.00719018	0.0164854		0.00540383	0.00822955		0.0157453	0.0124855		0.0218484	0.0133824
-32	0.00825438	0.0160135		0.00538891	0.00906468		0.0141459	0.0134698		0.0212473	0.0131628
-30	0.00884909	0.0167615		0.00504547	0.00914822		0.0142658	0.0124553		0.0242447	0.0130698
-28	0.00955672	0.0162253		0.00457665	0.00871119		0.0117415	0.0119566		0.0266433	0.014299
-26	0.00903651	0.0161596		0.00474584	0.00830116		0.0117411	0.0115088		0.0334768	0.0152151
-24	0.00951129	0.0132914		0.00437232	0.00927423		0.0128691	0.0107543		0.0360504	0.0143276
-22	0.00998547	0.0144186		0.00475249	0.00994935		0.0119321	0.0129397		0.0258152	0.0131503
-20	0.0110084	0.0146697		0.00484254	0.00860325		0.0114313	0.0122041		0.0255868	0.0129792
-18	0.0107203	0.0132423		0.00509235	0.00924078		0.0123611	0.0151626		0.0283568	0.0153486
-16	0.0116043	0.0144792		0.00534673	0.0101969		0.0121767	0.0134071		0.0271129	0.0134864
-14	0.0116297	0.0154997		0.00519651	0.00891553		0.010723	0.0128027		0.022091	0.0140633
-12	0.0131262	0.0177393		0.00565327	0.00921908		0.0114559	0.0139901		0.0196843	0.0147346
-10	0.0140351	0.018575		0.00494968	0.00906055		0.0115848	0.012572		0.0184748	0.0145584
-8	0.0133387	0.0194819		0.00572917	0.0106222		0.0107136	0.0119121		0.0179169	0.0141318
-6	0.0135376	0.0245738		0.00576381	0.00991514		0.00915413	0.0136653		0.0162533	0.0142689
-4	0.0140589	0.0215265		0.00597719	0.00882387		0.0109368	0.0156522		0.0158432	0.014584
-2	0.0119086	0.0187689		0.0055408	0.00889649		0.0107389	0.0146035		0.0136875	0.0148597
1.27e-13	0.0140672	0.0205106		0.00747036	0.0119747		0.0116878	0.0182358		0.0143518	0.0148694
2	0.0111115	0.0142854		0.00616105	0.00934201		0.00996203	0.0140706		0.0118444	0.0129489
4	0.0127293	0.0150819		0.00676628	0.0116657		0.0097459	0.0133714		0.0123067	0.0137573
6	0.0133079	0.0135675		0.00650473	0.0129301		0.00845797	0.0160183		0.0113211	0.0141884
8	0.0134476	0.0137764		0.00775046	0.0121298		0.00853884	0.0184703		0.0115849	0.0133772
10	0.0133774	0.0136802		0.00775382	0.0110474		0.00885747	0.0177766		0.0106199	0.013827
12	0.0141742	0.012764		0.00818345	0.0104323		0.00996179	0.0220584		0.0114223	0.0137794
14	0.0163835	0.0111946		0.00793878	0.0109943		0.00897299	0.0214471		0.00979306	0.01362
16	0.0193827	0.0105982		0.00922105	0.0123703		0.00982356	0.022298		0.0100391	0.0120815
18	0.016016	0.0100856		0.00921778	0.0125918		0.00856342	0.0181106		0.0086894	0.011546
20	0.0181127	0.0105833		0.00841879	0.0127864		0.00805503	0.0193981		0.00868858	0.0120167
22	0.0153518	0.00878265		0.00887617	0.0140899		0.00759223	0.0178518		0.00900106	0.0109639
24	0.0137245	0.00809075		0.00978653	0.0143569		0.00837608	0.0164411		0.00789763	0.0113946
26	0.0139575	0.00822555		0.0113422	0.0122725		0.0072422	0.0154442		0.00828188	0.0124061
28	0.0119772	0.00690968		0.0114784	0.0115704		0.00749555	0.0151002		0.00759374	0.0109805
30	0.0145676	0.00751041		0.0107317	0.0116983		0.00773837	0.0188193		0.007362	0.0116148
32	0.0149368	0.00749668		0.0113432	0.0107536		0.00728507	0.0168277		0.00765445	0.0113603
34	0.01337	0.00811999		0.0141465	0.0112432		0.00736874	0.0139076		0.00681055	0.0115295
36	0.0142995	0.00750745		0.0139913	0.011784		0.00668482	0.0130557		0.00713281	0.0103282
38	0.0132548	0.00777105		0.0153912	0.0126586		0.00741574	0.0114521		0.00688643	0.00999246
40	0.0140566	0.00777348		0.0171603	0.0111268		0.00679694	0.0119663		0.0071011	0.0105273
42	0.0102883	0.00727929		0.0242028	0.010828		0.00689177	0.00972806		0.00643013	0.0112605
44	0.0108032	0.00816487		0.0264059	0.0111746		0.00693667	0.0094543		0.00651638	0.0102351
46	0.0103934	0.00731864		0.0232637	0.0132511		0.00620328	0.0100897		0.00634825	0.010355
48	0.0117446	0.00806651		0.0246737	0.013175		0.00700161	0.0098293		0.00689282	0.00998707
50	0.0107812	0.00710139		0.0274519	0.0131582		0.00648823	0.00912698		0.00540579	0.00925054
52	0.010834	0.00728699		0.0264584	0.0130821		0.00785224	0.00878011		0.0061309	0.00912472
54	0.0100229	0.00783127		0.0239766	0.0126096		0.00729823	0.00926137		0.00652563	0.0094508
56	0.00930985	0.00680794		0.0229137	0.0136302		0.00768546	0.00846284		0.00515593	0.00897906
58	0.00902427	0.00617499		0.0229847	0.0132715		0.00710339	0.00871997		0.00572949	0.00914173
60	0.010087	0.00676991		0.0243616	0.013511		0.00652514	0.00800914		0.00570195	0.00863847
62	0.00899058	0.00700211		0.0186644	0.0128701		0.00601725	0.00832761		0.00534197	0.00738491
64	0.0114109	0.00720101		0.0188886	0.0138231		0.00686983	0.00715453		0.00522605	0.00879952
66	0.00980135	0.00664871		0.0196686	0.0117916		0.00624582	0.0071161		0.00493679	0.0088654
68	0.0101791	0.00635832		0.0218962	0.0125284		0.00724953	0.00807554		0.00486962	0.00896571
70	0.00969471	0.0061952		0.0179407	0.0115022		0.00682071	0.00714812		0.00547944	0.00774656
72	0.0117078	0.00613904		0.0184441	0.0124806		0.00638572	0.00623289		0.00526231	0.00843558
74	0.0122549	0.00604588		0.0212749	0.0126549		0.00653992	0.00700269		0.00583252	0.00836486
76	0.0129156	0.00592654		0.0182066	0.0149152		0.00631918	0.00647634		0.00486583	0.00870815
78	0.0112963	0.00532403		0.0162107	0.0139314		0.00728744	0.00771169		0.00517815	0.00950048
80	0.0105741	0.00594033		0.0157593	0.0129851		0.00706998	0.00709845		0.00617932	0.00924683
82	0.0084048	0.00612639		0.0156947	0.0128922		0.00645235	0.0063545		0.00602599	0.00851418
84	0.00858598	0.00579752		0.0153334	0.0125702		0.00711995	0.00762727		0.00626606	0.00938313
86	0.00806759	0.00640467		0.0135305	0.0134636		0.00753053	0.0077522		0.00589031	0.00918014
88	0.00796422	0.00631305		0.0119741	0.0103213		0.00690903	0.00700379		0.0057574	0.00942963

## Sheet: Figure 3d
	EGI-1			KPC			MMTV-PyMT			mPDAC
	Control	BAPN		Control	BAPN		Control	BAPN		Control	BAPN
Number of values	61	57		68	56		86	66		65	65
Minimum	0.895	0.9342		0.4537	0.9234		0.8078	0.9262		0.9459	0.9651
25% Percentile	0.9989	1.101		0.9803	1.064		0.9741	1.037		1.014	1.096
Median	1.038	1.199		1.009	1.158		1.012	1.088		1.048	1.202
75% Percentile	1.07	1.351		1.08	1.309		1.035	1.202		1.105	1.387
Maximum	1.273	2.094		2	1.954		1.192	1.792		1.829	3.142
Mean	1.04	1.257		1.029	1.23		1.013	1.135		1.094	1.309
Std. Deviation	0.06046	0.2222		0.172	0.2347		0.05785	0.1571		0.1591	0.3947
Std. Error	0.007741	0.02943		0.02086	0.03136		0.006239	0.01933		0.01973	0.04896
Lower 95% CI of mean	1.025	1.198		0.9878	1.167		1	1.096		1.055	1.211
Upper 95% CI of mean	1.056	1.316		1.071	1.293		1.025	1.173		1.134	1.407
Sum	63.45	71.62		70	68.9		87.08	74.89		71.12	85.09
Mann Whitney test
P value	< 0,0001			< 0,0001			< 0,0001			< 0,0001
Exact or approximate P value?	Gaussian Approximation			Gaussian Approximation			Gaussian Approximation			Gaussian Approximation
P value summary	***			***			***			***
Are medians signif. different? (P < 0.05)	Yes			Yes			Yes			Yes
One- or two-tailed P value?	Two-tailed			Two-tailed			Two-tailed			Two-tailed
Sum of ranks in column A,B	2353 , 4668			3034 , 4716			4870 , 6758			3125 , 5390
Mann-Whitney U	462			688			1129			980

## Sheet: Figure 3e
	EGI-1			KPC			MMTV-PyMT			mPDAC
	Control	BAPN		Control	BAPN		Control	BAPN		Control	BAPN
Number of values	21	24		10	12		10	7		7	9
Minimum	0.15	0.01		2.04	0.53		0.33	0.01		0.79	0.08
25% Percentile	1.13	0.055		3.14	0.9275		2.048	0.2		1.38	0.125
Median	3.64	0.295		4.36	2		4.185	1.13		2.45	1.11
75% Percentile	10.47	0.6925		5	2.568		7.505	2.52		3.63	2.035
Maximum	22.95	10.69		6.69	3.12		12.15	3.2		6.86	2.57
Mean	6.059	1.545		4.195	1.874		4.82	1.339		2.766	1.224
Std. Deviation	6.442	3.259		1.381	0.9017		3.595	1.253		2.028	0.9539
Std. Error	1.406	0.6652		0.4366	0.2603		1.137	0.4738		0.7667	0.318
Lower 95% CI of mean	3.127	0.1684		3.207	1.301		2.248	0.1793		0.8897	0.4912
Upper 95% CI of mean	8.992	2.921		5.183	2.447		7.392	2.498		4.642	1.958
Sum	127.2	37.07		41.95	22.49		48.2	9.37		19.36	11.02
Mann Whitney test
P value	0.0001			0.0005			0.0136			0.0907
Exact or approximate P value?	Gaussian Approximation			Gaussian Approximation			Exact			Exact
P value summary	***			***			*			ns
Are medians signif. different? (P < 0.05)	Yes			Yes			Yes			No
One- or two-tailed P value?	Two-tailed			Two-tailed			Two-tailed			Two-tailed
Sum of ranks in column A,B	654,5 , 380,5			168 , 85			115 , 38			76 , 60
Mann-Whitney U	80.5			7			10			15
