# Supplementary material for: Tumor stiffening reversion through collagen crosslinking inhibition improves T cell migration and anti-PD-1 treatment
Source: eLife. 2021 Jun 9;10:e58688. doi: 10.7554/eLife.58688 (PMC8203293; doi:10.7554/eLife.58688)
Supplement: Figure 4—source data 1. [file elife-58688-fig4-data1.xlsx]

## Sheet: Figure 4A
Storage modulus for each sample in 0-25% compression (Pa)
		Control 1	Control 2	Control 3	Control 4	Control 5	BAPN 1	BAPN 2	BAPN 3	BAPN 4	BAPN 5
0	1	1590	1070	1040	1500	897	935	395	828	354	753
	2	1610	1080	1070	1520	937	934	396	849	366	786
	3	1640	1090	1090	1520	962	950	414	868	368	805
	4	1710	1100	1100	1520	931	967	403	889	373	804
	5	1810	1110	1150	1530	929	995	404	927	374	776
	6	1860	1130	1190	1540	986	1010	407	940	379	783
	7	1890	1130	1200	1540	1020	1010	396	956	386	777
	8	1950	1150	1250	1540	1020	1020	417	974	396	781
	9	2000	1150	1290	1550	1010	1040	419	997	397	795
	10	2070	1170	1320	1560	1080	1040	421	1010	400	823
	11	2100	1180	1340	1570	1120	1030	422	1020	385	857
	12	2200	1210	1360	1590	1170	1030	431	1050	414	902
	13	2260	1220	1370	1600	1140	1040	436	1050	418	940
	14	2350	1240	1390	1600	1110	1040	440	1040	431	990
	15	2420	1250	1400	1610	1160	1040	445	1060	434	1060
	16	2380	1260	1420	1640	1230	1060	451	1060	434	1080
	17	2480	1270	1440	1650	1270	1080	445	1050	444	1110
	18	2580	1280	1460	1670	1220	1100	443	1060	448	1130
	19	2610	1290	1470	1690	1240	1110	475	1080	447	1190
	20	2710	1300	1490	1700	1310	1110	478	1100	456	1220
	21	2800	1310	1510	1710	1340	1140	477	1130	458	1200
	22	2790	1320	1520	1730	1330	1160	477	1170	466	1190
	23	2760	1330	1530	1740	1320	1170	485	1170	464	1200
	24	2810	1350	1540	1730	1440	1180	483	1190	481	1230
	25	2970	1370	1560	1730	1540	1150	485	1230	482	1320
	26	3040	1380	1590	1730	1700	1160	485	1250	482	1380
	27	3070	1410	1600	1740	1780	1150	487	1280	488	1450
	28	3250	1430	1600	1780	1850	1150	488	1290	500	1510
	29	3450	1450	1610	1810	1960	1150	513	1310	508	1590
	30	3580	1470	1620	1810	2020	1150	520	1310	508	1670
0.05	1	5450	2480	2610	2410	3220	1470	645	1680	631	2590
	2	5460	2460	2600	2410	3210	1470	640	1620	631	2680
	3	5490	2450	2580	2390	3120	1500	657	1630	632	2580
	4	5370	2430	2600	2380	3340	1500	669	1610	638	2630
	5	5560	2440	2580	2340	3650	1530	668	1700	635	2490
	6	5630	2440	2590	2390	3900	1540	674	1700	632	2470
	7	5840	2440	2580	2430	4100	1510	677	1740	639	2400
	8	6190	2470	2600	2430	4300	1500	685	1730	642	2420
	9	6310	2480	2590	2430	4470	1500	688	1780	635	2920
	10	6470	2500	2580	2430	4750	1500	685	1740	645	3040
	11	6580	2510	2560	2430	4810	1500	697	1760	642	3100
	12	6110	2520	2540	2470	5330	1510	695	1790	652	3560
	13	6400	2520	2530	2510	5820	1530	706	1830	660	3970
	14	6550	2540	2560	2500	6160	1540	703	1790	624	4380
	15	6920	2590	2560	2510	6390	1580	731	1760	663	4770
	16	6530	2610	2580	2510	6190	1610	736	1760	670	5190
	17	6770	2610	2600	2540	6160	1630	753	1760	684	5600
	18	6770	2640	2600	2560	6440	1620	772	1790	668	4350
	19	5930	2600	2630	2620	7030	1690	795	1810	674	3710
	20	6350	2590	2650	2670	7380	1730	795	1830	690	3830
	21	6710	2570	2660	2680	8190	1700	780	1830	701	3670
	22	6550	2530	2690	2660	8410	1700	779	1840	692	3350
	23	6800	2550	2680	2680	9100	1730	780	1830	692	3670
	24	6630	2550	2690	2740	9330	1740	790	1900	706	4260
	25	6990	2540	2720	2810	10100	1740	805	2010	691	4340
	26	7700	2550	2750	2860	10200	1730	793	1970	695	5500
	27	7970	2570	2730	2880	9230	1750	804	1940	698	6500
	28	8350	2640	2740	2910	9850	1760	807	1950	696	7750
	29	8640	2730	2760	2950	9200	1890	822	1960	701	8930
	30	8790	2800	2740	3000	9550	1900	828	1960	722	9250
0.1	1	11800	5230	4860	4600	15900	2780	1110	2590	992	7620
	2	11100	5020	4530	4510	15300	2740	1120	2520	1000	6270
	3	10700	4970	4430	4430	16100	2700	1110	2570	980	6490
	4	11000	4920	4400	4410	16500	2650	1110	2560	978	6520
	5	10700	4760	4320	4340	17300	2740	1130	2640	991	6470
	6	10600	4670	4280	4280	17800	2690	1120	2690	974	7770
	7	11400	4720	4240	4220	16300	2650	1120	2750	971	8940
	8	11600	4730	4200	4230	16000	2700	1130	2710	968	9750
	9	11300	4800	4160	4320	17400	2800	1150	2660	965	11200
	10	12000	4710	4150	4380	17400	2820	1160	2620	974	11800
	11	12700	4680	4090	4430	17200	2870	1170	2600	979	12200
	12	13000	4750	4030	4410	17700	2840	1170	2560	992	14000
	13	13700	4820	3930	4390	18200	2840	1180	2560	1030	14400
	14	13200	4920	3870	4360	17000	2950	1190	2560	1020	14900
	15	13300	4980	3830	4430	18800	3000	1280	2570	1010	15300
	16	13100	5020	3790	4530	18900	3090	1270	2600	1010	11400
	17	12000	4990	3770	4480	20300	3160	1280	2610	1050	10800
	18	12600	5050	3740	4510	18500	3220	1260	2670	1020	9680
	19	12800	5110	3700	4600	17700	3330	1290	2760	998	9190
	20	14000	5130	3740	4650	17800	3270	1290	2730	987	10000
	21	15200	5230	3730	4700	18300	3330	1360	2790	989	9700
	22	16500	5150	3760	4870	17700	3410	1400	2800	976	10700
	23	15500	5180	3760	4870	18100	3420	1450	2780	987	11900
	24	16500	5280	3780	4910	17600	3350	1510	2750	988	12700
	25	14900	5410	3800	5030	20800	3420	1520	2750	996	12400
	26	16200	5600	3720	4900	22300	3580	1450	2780	986	15700
	27	18200	5710	3690	5000	21100	3660	1580	2820	982	15300
	28	19300	5790	3730	5070	20000	3710	1710	2820	992	18400
	29	20100	5900	3780	5180	19900	3650	1780	2850	992	19900
	30	19100	6020	3850	5280	19900	3760	1770	2830	1010	19600
0.15	1	26500	11100	7050	8590	32500	5870	2630	4160	1760	18800
	2	24400	10400	6620	8280	29000	5700	2600	4110	1660	16000
	3	23700	10200	6420	7980	27500	5830	2590	4150	1630	17100
	4	23800	10000	6190	7840	28300	5690	2570	4230	1640	17400
	5	23400	9820	6040	7870	27000	5760	2590	4150	1560	21400
	6	23700	9670	5920	7710	27700	5860	2620	4170	1540	21300
	7	23800	9620	5840	7540	26400	5820	2760	4070	1520	22700
	8	23800	9520	5780	7650	28600	6170	2940	4090	1520	23300
	9	24100	9460	5740	7670	27800	6470	2850	4110	1500	21800
	10	23800	9440	5620	7720	28800	6610	2770	4190	1490	24200
	11	21700	9550	5470	7650	29900	6830	2750	4230	1520	23000
	12	20000	9540	5310	7450	30200	6670	2800	4170	1600	25100
	13	19600	9590	5290	7370	28300	6900	2900	4090	1630	22800
	14	21300	9560	5210	7310	28300	7210	2900	4010	1560	21400
	15	23300	9460	5220	7190	26200	7510	2860	3940	1600	20200
	16	23900	9540	5100	7240	25300	7900	2910	3950	1640	18900
	17	24800	9550	5050	7350	25000	7840	2930	4030	1590	18900
	18	24900	9530	5020	7340	25600	7720	2990	4120	1510	18300
	19	24800	9480	5160	7330	25200	7490	3020	4130	1510	17200
	20	25400	9430	5180	7360	24900	7600	3030	4230	1500	18800
	21	26100	9290	5190	7450	25500	7610	3100	4350	1490	20200
	22	27400	9180	5210	7640	25700	7420	3280	4320	1470	22800
	23	28400	9090	5180	7740	25900	7460	3370	4200	1430	26400
	24	28700	8980	5120	7770	25800	7430	3630	4220	1410	28100
	25	28300	9080	5040	7980	27100	7440	3760	4340	1400	27500
	26	28400	9570	4920	8100	27300	7560	3690	4290	1400	32200
	27	29600	9630	4860	8240	27100	7830	3770	4250	1390	35500
	28	29800	9710	4890	8290	27000	7980	3720	4370	1380	37300
	29	29700	9700	4950	8430	26800	8770	3770	4320	1390	40300
	30	31000	9830	4980	8550	26400	9280	3780	4350	1380	38000
0.2	1	36300	18900	9710	14900	40200	14200	5140	6600	3040	38300
	2	32700	17200	9200	14000	36600	13000	5000	6280	2860	35500
	3	30900	16500	8880	13700	35200	12800	5030	6210	2850	35800
	4	31300	15900	8660	13500	33700	12800	5010	6210	2680	35200
	5	30500	15400	8420	13200	31900	12600	5010	6200	2740	37400
	6	31100	15000	8270	13000	31300	12300	5120	6140	2650	36500
	7	31900	14700	8060	12900	30300	12200	5270	6050	2500	38200
	8	32200	14400	7780	12700	29400	12300	5300	5840	2410	39800
	9	33000	14200	7620	12600	28800	12700	5390	5780	2330	42700
	10	33100	14100	7460	12600	29400	13100	5360	5840	2330	44800
	11	31800	14100	7400	12500	29700	13600	5500	5850	2290	47800
	12	30500	13900	7230	12500	28600	14100	5720	5770	2290	49600
	13	29500	13800	7150	12500	28400	14600	5700	5680	2310	50200
	14	29800	13700	7120	12400	29600	14900	5820	5690	2280	45200
	15	28400	13400	7140	12500	29100	15400	5790	5710	2190	44300
	16	28800	13400	7150	12600	28500	15900	6080	5640	2180	42500
	17	28200	13300	7130	12600	29600	16600	6300	5650	2130	41000
	18	28000	13200	7180	12700	29000	17000	6370	5610	2110	37200
	19	29700	13000	7200	12700	29800	16500	6360	5780	2100	35600
	20	31900	12900	7230	12800	30000	16100	6400	5830	2160	36500
	21	33500	12800	7190	13000	29300	16300	6570	5820	2150	35400
	22	35100	12800	7280	13100	29900	15700	6640	5680	2100	35500
	23	35000	12800	7200	13000	30100	15300	6770	5670	2060	37200
	24	34000	12700	7150	13200	30600	15100	6740	5740	2060	40100
	25	34400	12700	6950	13200	31700	15600	6880	5710	2010	45100
	26	36100	12800	7030	13100	32900	16000	6890	5720	2050	49100
	27	37200	13000	7130	13400	32900	16700	6970	5660	2000	53500
	28	37900	13100	7220	13500	32600	16600	7100	5710	2000	54600
	29	33400	13100	7290	13600	32700	17300	7270	5800	2060	54200
	30	34100	13100	7350	13800	34200	17900	7480	5840	2090	54800
0.25	1	53900	26100	13900	24600	59000	26000	9450	9320	5170	61400
	2	49000	23400	12800	22900	55400	24300	9250	8990	4840	56700
	3	48700	21900	12300	22100	52000	23700	9340	8680	4570	58900
	4	49200	21100	12000	21500	51600	22400	9400	8660	4310	61200
	5	46500	20200	11500	21000	46800	21600	9510	8540	4090	64200
	6	46700	19800	11300	20600	46800	21200	9550	8470	3980	69000
	7	47400	19500	11000	20100	49200	21600	9620	8420	3950	72400
	8	46600	19200	10700	19500	51200	22500	9590	8330	3780	76600
	9	45100	18900	10600	19800	50000	22200	9650	8250	3650	77000
	10	44800	18700	10600	19700	49700	21800	10200	8220	3570	73900
	11	43100	18600	10400	19900	48300	21900	10700	8020	3510	73600
	12	41700	18600	10100	19500	47700	23200	11100	8060	3400	72200
	13	41000	18600	10100	19600	48900	23600	11100	7950	3370	69100
	14	40700	18600	9980	19500	50800	23900	11000	7780	3330	65800
	15	40300	18600	9750	19800	45900	25000	11200	7630	3260	60600
	16	39900	18600	9720	20100	46700	24100	11300	7590	3240	59200
	17	39800	18600	9740	20200	48500	24200	11300	7570	3170	59100
	18	39900	18600	9750	20000	50400	25200	11400	7410	3250	66400
	19	39900	18600	9830	19900	51400	24100	11800	7400	3150	66100
	20	39900	18700	9750	20200	51300	23100	11900	7550	3100	66300
	21	41100	18600	9850	20400	50100	22700	11800	7660	3080	70600
	22	42700	18500	9920	20800	52200	22300	12400	7630	3050	74700
	23	42500	18600	9810	21000	51500	21800	12800	7780	3020	82100
	24	42500	18700	9650	21100	52400	21800	13000	7730	2990	86200
	25	43900	18700	9690	21000	52900	21500	13400	7690	3040	89300
	26	42900	19000	9820	21200	54800	21900	13800	7450	2970	93200
	27	42600	19200	10000	21500	55600	22800	14400	7400	2960	88800
	28	42600	19300	10200	21600	56500	23500	14600	7530	2940	93000
	29	42900	19600	10300	22200	55500	23400	15100	7540	2890	88200
	30	42600	19900	10300	22400	55700	24700	15300	7310	2860	84000

## Sheet: Figure 4B
Young's modulus (kPa) AFM indentation
Control	BAPN
1.36543	0.04887
2.84096	0.03455
3.52698	0.03679
0.46347	0.03523
0.72812	0.0378
1.34255	0.04327
0.7538	0.055
0.68634	0.06959
1.22097	0.05304
1.46129	0.03958
1.29564	0.05959
0.63939	0.055
0.45678	0.04696
0.93	0.05141
2.8239	0.04317
2.68025	0.04434
1.67188	0.0486
3.53175	0.04709
2.05331	0.05589
0.31128	0.0797
0.62398	0.06053
1.11867	0.05402
2.01141	0.04482
0.73275	0.06659
1.3251	0.04652
2.30158	0.04223
1.36843	0.04454
2.84841	0.04329
3.25104	0.06634
1.68491	0.05969
1.26571	0.05257
2.2143	0.03317
1.72098	0.03544
1.96881	0.05861
1.40778	0.05563
2.83726	0.04758
1.41701	0.04994
1.19375	0.0377
1.49598	0.05404
0.73383	0.08106
1.00706	0.05839
2.068	0.05971
2.01605	0.06796
2.68635	0.05131
2.20344	0.04017
2.67484	0.04236
3.34153	0.03628
2.97922	0.04324
3.22919	0.04825
0.99827	0.05691
0.41661	0.10178
1.25666	0.05532
2.75375	0.06203
4.59348	0.0581
2.68403	0.06175
1.98187	0.10468
2.55797	0.03677
2.28626	0.05549
0.96495	0.0763
2.37189	0.05739
1.68516	0.03279
2.08552	0.03079
1.87523	0.02918
1.35184	0.04302
1.486	0.07956
0.95365	0.05397
2.14659	0.09682
3.85317	0.06555
1.35248	0.05637
1.45908	0.04104
1.0086	0.03259
1.13662	0.0414
1.01786	0.04348
1.21861	0.0227
1.15135	0.03227
1.41043	0.02784
0.93204	0.03843
1.03296	0.03695
1.3943	0.04181
0.93465	0.03624
2.71753	0.04352
0.62126	0.03614
1.05257	0.04409
1.01574	0.04705
1.40875	0.04855
2.3531	0.04001
3.1871	0.03969
0.47448	0.03666
0.75683	0.04187
1.09045	0.03974
5.08957	0.0381
1.16771	0.03998
0.98995	0.03772
1.79749	0.03703
1.92886	0.04157
2.25489	0.03732
1.16807	0.03718
0.7699	0.03674
0.40764	0.03322
0.43359	0.04353
0.47263	0.03883
1.29144	0.03408
1.36867	0.03289
1.48391	0.03439
1.90504	0.03378
2.03667	0.03838
0.98809	0.03702
1.09557	0.03496
1.65575	0.03672
1.63292	0.03769
1.70016	0.03732
1.25609	0.03526
1.14652	0.02952
0.53674	0.03073
0.25436	0.04084
0.35079	0.03986
0.56147	0.03816
1.22016	0.03259
2.25515	0.03213
1.3592	0.0259
2.11651	0.03475
2.52339	0.03541
2.95784	0.03573
1.66422	0.03529
0.86596	0.03624
0.58277	0.03154
0.36624	0.0297
1.29368	0.02954
0.70611	0.03389
0.7834	0.03584
1.93204	0.03769
0.84324	0.04012
1.16415	0.04137
0.91387	0.03584
1.44662	0.03106
1.21365	0.03224
0.65737	0.03414
1.9239	0.03637
1.42981	0.03913
1.57993	0.0335
1.72598	0.03424
0.68449	0.03391
0.50208	0.03254
0.47993	0.02853
0.95075	0.03428
1.18119	0.04368
2.17812	0.03673
1.27736	0.03821
1.08195	0.03905
0.97169	0.03837
0.64089	0.03031
3.01037	0.03804
1.29254	0.03257
1.4517	0.03759
2.94314	0.03276
1.76492	0.03097
2.04311	0.03155
1.31228	0.03283
0.37455	0.02345
1.33787	0.03455
1.01575	0.0455
0.71986	0.06175
1.52204	0.06351
1.18015	0.06287
2.34851	0.05574
0.42457	0.07812
1.21752	0.09558
0.86765	0.04568
0.6737	0.0634
0.87736	0.059
1.34158	0.06824
1.90851	0.06407
3.3284	0.05068
2.89922	0.0433
4.4596	0.05316
4.33062	0.05899
5.33645	0.04742
1.08325	0.06362
0.89575	0.06279
3.22939	0.07018
1.24527	0.05548
1.76992	0.06655
2.39124	0.05456
3.90614	0.05682
0.60013	0.05797
0.5876	0.04509
0.91718	0.04557
1.30364	0.05249
1.55251	0.05403
0.84839	0.05996
1.59892	0.05795
1.32971	0.06284
1.20065	0.06023
1.51864	0.07489
1.59316	0.06065
1.17893	0.0685
1.62054	0.0647
0.95342	0.05586
1.26389	0.03962
1.75063	0.04531
1.04097	0.03032
0.76413	0.04423
1.60095	0.05567
0.93571	0.05786
1.63324	0.07193
1.48187	0.07564
1.27527	0.08344
1.57032	0.06889
2.20598	0.06685
2.00897	0.05547
1.69172	0.0379
1.28784	0.04333
0.91387	0.04623
2.20395	0.05662
3.58407	0.06361
1.00392	0.07042
1.22549	0.06908
2.31825	0.08309
1.05041	0.0788
1.26206	0.05492
2.00963	0.05997
2.94455	0.07697
1.21042	0.059
1.08706	0.05476
0.96795	0.05698
1.14688	0.04069
2.07587	0.0556
0.60673	0.05957
1.59411	0.07777
1.99939	0.09137
0.68468	0.09528
1.63186	0.06267
0.80011	0.05441
1.12642	0.05752
1.00114	0.06627
1.422	0.06466
1.29201	0.03878
1.23285	0.04228
1.31508	0.05263
1.24851	0.05577
1.76071	0.05053
1.76412	0.05227
1.5373	0.0873
3.29009	0.07567
1.46813	0.08357
2.55364	0.07397
1.2592	0.05147
0.87546	0.05265
1.35855	0.05993
3.8945	0.0563
1.86072	0.04456
1.41184	0.02666
1.45218	0.05021
1.64182	0.05637
2.10217	0.05921
3.02606	0.06222
0.48817	0.07601
0.90693	0.08744
1.57511	0.07925
0.78347	0.08759
1.43643	0.06504
2.42647	0.06151
1.98284	0.05707
0.846	0.06022
0.59492	0.05181
0.3193	0.03496
0.30383	0.06784
0.25576	0.08203
0.75449	0.08034
1.10045	0.07759
1.35836	0.0594
1.31772	0.06747
1.48845	0.06985
2.45202	0.08408
1.62476	0.08617
1.27647	0.09128
1.87596	0.08497
1.04503	0.09149
1.51979	0.08702
1.32658	0.10512
1.58677	0.09282
4.07432	0.08643
1.39054	0.09278
1.26424	0.07469
1.08158	0.08814
2.38427	0.07827
2.20065	0.07062
1.74524	0.07775
2.03926	0.07672
1.25571	0.08293
1.43547	0.09541
1.63607	0.10253
2.04035	0.07801
1.3219	0.09037
1.63264	0.10024
1.73491	0.10046
1.69136	0.10413
2.82171	0.10909
1.52746	0.10212
1.36818	0.1025
2.55446	0.09945
2.39383	0.10095
2.07434	0.10214
0.98162	0.10996
0.57407	0.13192
2.19945	0.12188
2.66675	0.14392
3.23973	0.12501
3.47361	0.11387
0.67858	0.11269
1.70532	0.10913
2.14303	0.11562
2.40633	0.11517
1.44745	0.12331
0.94182	0.12106
0.50207	0.15073
3.12173	0.12884
3.38512	0.13472
3.87938	0.12068
4.78238	0.12151
4.27638	0.10756
1.16592	0.13195
0.6981	0.1156
1.71052	0.12022
0.74057	0.12098
1.26587	0.11077
2.92935	0.0791
5.67541	0.10486
3.1229	0.09542
4.67044	0.09497
3.70637	0.07698
3.22514	0.07492
6.23073	0.10259
1.537	0.09832
1.3036	0.14118
1.96368	0.13812
3.79793	0.13646
3.01843	0.16901
2.78444	0.13542
3.7613	0.12977
3.75302	0.17203
1.88312	0.13712
0.9817	0.15265
2.28222	0.14337
3.31317	0.11065
2.17238	0.08224
2.87738	0.13007
2.65979	0.17516
0.32226	0.18232
0.29096	0.17406
0.22741	0.11536
0.9072	0.10913
0.50041	0.05285
0.77621	0.06467
0.70816	0.05976
1.02031	0.05628
0.54312	0.09599
0.79536	0.13573
0.12211	0.1565
0.18938	0.10014
0.17019	0.03061
1.81948	0.04409
0.68058	0.04624
0.52343	0.05215
0.56151	0.06423
1.03392	0.04282
0.65336	0.0691
0.7794	0.04295
0.47277	0.05417
0.53888	0.06173
0.56844	0.06472
0.63575	0.05508
0.99359	0.05394
1.13364	0.04776
1.19874	0.04726
1.23395	0.0301
1.08119	0.03446
0.5577	0.04086
0.50111	0.04995
0.65058	0.05132
0.41588	0.06522
0.51401	0.05745
1.05292	0.06095
1.83437	0.05324
0.76159	0.05736
0.95791	0.0635
0.9358	0.06984
0.59331	0.06691
0.45564	0.06023
0.57813	0.05153
0.71289	0.04556
2.00657	0.03692
3.29796	0.04016
2.57354	0.05142
0.83206	0.04787
0.35699	0.06258
0.65553	0.06773
0.37738	0.0613
1.33274	0.06299
1.592	0.05876
0.36999	0.06299
2.20797	0.07537
2.30925	0.08209
3.34058	0.0632
2.33855	0.06766
0.87503	0.04677
0.50002	0.05687
0.67119	0.06522
0.63996	0.07582
0.79172	0.0673
1.12137	0.06818
1.81859	0.07488
3.00491	0.07031
1.64645	0.07087
2.19408	0.06959
0.84115	0.06232
1.35367	0.06014
2.63206	0.04908
2.42875	0.09541
1.43036	0.11981
1.34125	0.12951
1.15575	0.12056
0.91662	0.11486
0.69194	0.0918
0.64352	0.07408
0.52477	0.06021
0.8597	0.06307
1.21041	0.05574
1.05286	0.05641
2.00335	0.08803
1.22613	0.08394
0.89765	0.09546
0.88843	0.14475
1.0484	0.12034
0.54955	0.11453
1.07745	0.12561
0.95551	0.11731
0.81019	0.10548
0.73843	0.09768
0.70376	0.09339
0.45893	0.12192
0.75236	0.14559
0.74563	0.11595
0.86343	0.10202
0.84078	0.07619
0.57944	0.08189
1.42058	0.08641
0.58943	0.07562
0.85728	0.08462
0.95511	0.10069
0.55982	0.12133
0.67505	0.25815
1.01487	0.33874
1.05148	0.34333
1.00372	0.27248
0.77406	0.29685
1.14505	0.22947
0.99386	0.23188
0.98911	0.21635
0.90783	0.21683
0.62494	0.24767
1.1143	0.26069
0.85246	0.38555
0.54729	0.6634
0.77703	0.61331
1.20471	0.3851
1.30965	0.42447
1.20536	0.18038
1.36037	0.30498
0.917	0.30748
1.10169	0.93165
0.87571	0.3204
0.9579	0.23949
0.94823	0.42396
1.11093	0.18645
1.49674	0.1637
1.44884	0.23206
1.46503	0.23278
1.67326	0.19261
1.33441	0.16227
1.5698	0.19952
1.32495	0.23541
1.62139	0.17231
1.34768	0.24372
0.90903	0.23369
0.97889	0.23775
0.81918	0.33022
0.91696	0.26339
0.62055	0.26222
0.53466	0.38402
0.7297	0.32045
1.40889	0.24352
0.92948	0.33233
1.66034	0.37106
0.59961	0.32167
0.57962	0.28176
0.64391	0.34672
0.69231	0.60623
0.99725	0.72891
0.69956	0.69024
0.97765	0.42379
0.84776	0.61447
0.93105	0.82252
0.84679	0.75542
0.89541	0.8891
0.78909	0.61887
0.8886	0.82603
1.09371	0.81648
0.35488	0.63042
0.3908	0.2584
0.35687	0.7421
0.93417	0.59882
1.0503	0.51071
0.8325	0.58104
0.77749	0.55345
1.02759	0.43872
0.84096	0.60275
1.31344	0.2356
0.80163	0.69735
0.32475	0.82007
1.3714	0.523
0.77411	0.74186
0.67575	0.62018
0.45665	0.34204
0.67769	0.44235
0.901	0.49302
0.80991	0.57389
0.4509	0.50897
0.33483	0.43337
0.48353	0.47596
0.36209	0.53727
0.38883	0.56319
0.48354	0.8179
1.16413	0.48489
1.3107	0.7306
1.75809	1.22417
0.5877	1.71766
0.50165	0.95255
0.4668	1.1288
0.60787	0.71895
0.60908	0.72497
0.83796	1.03569
0.86007	0.31549
0.41735	0.15276
0.40896	0.22712
1.13318	0.29953
1.23327	0.243
1.165	0.90747
1.23658	0.87773
0.68209	0.83173
0.97783	0.62946
0.91776	0.64375
1.24757	0.90195
0.73527	1.04552
0.66111	0.69154
0.95281	0.29115
0.94315	0.22587
1.48695	0.21324
1.3045	0.18448
0.83725	0.22432
1.24956	0.23207
0.66288	0.80066
0.79429	0.72625
0.56157	0.87402
0.71519	0.53129
0.5666	0.81536
0.81865	0.96974
0.75994	0.67524
0.94129	0.93378
0.73109	0.94053
0.67015	0.56879
0.90904	0.27546
0.86391	0.17977
0.96356	0.15074
0.47779	0.1227
1.13471	0.15284
0.94016	0.36056
0.6723	0.67414
0.68041	0.70744
0.63872	1.26358
0.91982	0.89323
1.21259	0.66043
0.79681	1.06517
1.38604	0.84578
0.97269	1.0978
0.76271	0.8411
0.72985	0.76404
0.93026	1.13599
0.72998	1.06201
1.30453	1.06331
0.94086	1.24477
0.67773	0.5526
1.15186	0.48808
0.98091	0.6262
0.55121	0.41737
0.81587	0.28203
0.54689	0.33404
0.56346	0.41211
0.41448	0.37376
0.30381	0.64675
0.49199	0.39783
0.46457	0.36061
0.62202	0.54439
0.85564	0.70687
1.00867	0.70157
0.52743	0.55568
0.50467	0.52307
0.4101	0.58726
0.29368	0.42817
0.64405	0.40757
0.70226	0.72596
0.60971	0.81477
0.60722	0.84204
0.73748	0.48289
0.51722	0.53032
0.49902	0.38515
0.3777	0.34162
0.49922	0.23723
0.62715	0.29204
0.54756	0.3769
0.56925	0.40298
0.59868	0.33314
0.64946	0.4063
0.55205	0.37192
0.70495	0.41563
0.33446	0.65882
0.48266	0.81194
0.36695	0.80639
0.37136	0.2771
0.23566	0.42197
0.92014	0.61543
0.41003	0.35114
0.34131	0.25326
1.05097	0.27412
1.05716	0.25462
0.77562	0.28336
0.81549	0.69786
0.66401	0.51774
0.40164	0.77489
0.27232	0.35048
0.25476	0.46325
0.33644	0.50995
0.81743	0.38544
0.77044	0.63752
0.67707	0.61115
0.51041	0.56106
0.66786	0.48932
0.68349	0.49842
0.50656	0.38229
1.07072	0.43844
0.97194	0.6786
0.7708	0.34703
1.02706	0.55562
1.84651	0.40678
1.7917	0.41029
0.78873	0.48001
0.64281	0.60241
0.6768	0.4767
1.21947	0.375
0.68487	0.59966
0.36583	0.41466
0.27112	0.30761
0.24128	0.41199
0.26591	0.33591
0.3974	0.28924
0.37633	0.3366
0.33602	0.4205
0.33017	0.31416
0.32661	0.41374
0.32688	0.5661
0.41032	0.51059
0.31971	0.59919
0.24731	0.5364
0.38097	0.48621
0.3463	0.56799
0.28406	0.49242
0.2819	0.39135
0.35936	0.31213
0.37538	0.40255
0.3253	0.39873
0.29058	0.39755
0.32544	0.3695
0.30869	0.48137
0.34281	0.62857
0.27793	0.58152
0.31708	0.50704
0.29261	0.52751
0.24917	0.57796
0.25907	0.58338
0.35187	0.5656
0.28035	0.46547
0.33625	0.37994
0.39995	0.32888
0.21352	0.35416
0.28623	0.38913
0.28748	0.39007
0.23078	0.45343
0.32131	0.39447
0.31997	0.37612
0.32647	0.43908
0.36395	0.58928
0.37161	0.37189
0.37244	0.47592
0.18056	0.34693
0.28957	0.3789
0.28837	0.34271
0.24056	0.30014
0.33834	0.42656
0.38682	0.33434
0.18478	0.24227
0.31339	0.31151
0.27643	0.14755
0.35758	0.20973
0.42871	0.41128
0.44979	0.41761
0.42054	0.29155
2.22261	0.26498
5.64785	0.18421
2.76256	0.13244
3.72537	0.08775
2.35563	0.13779
1.76491	0.21856
1.11181	0.33289
0.98894	0.14434
0.66346	0.39288
1.07077	0.25193
1.21146	0.32295
2.01847	0.07324
3.23185	0.13357
2.83701	0.19759
3.91373	0.37191
4.21449	0.49579
4.75219	0.2948
2.64769	0.21601
2.82375	0.20354
2.31247	0.19327
1.79276	0.32742
1.587	0.39698
0.95233	0.37769
0.70341	0.21862
0.89955	0.19887
1.03254	0.20886
0.758	0.18039
2.05583	0.24168
1.88508	0.29915
2.79312	0.29601
2.31609	0.31584
3.09433	0.35731
2.10988	0.3355
2.26707	0.27975
1.61485	0.27663
2.32927	0.36883
1.99211	0.35939
1.17226	0.39919
1.44757	0.24532
1.23445	0.27829
1.75174	0.3409
1.33503	0.29428
1.20154	0.27844
1.54786	0.27032
1.34457	0.31182
2.43029	0.3345
2.54078	0.32573
1.733	0.31127
2.02782	0.33946
2.23535	0.30399
1.72857	0.32195
1.84058	0.2167
1.47298	0.19049
1.71308	0.29116
1.56493	0.30611
1.71003	0.34405
1.66124	0.44329
1.53926	0.45575
1.79553	0.37853
1.99362	0.29843
1.78223	0.41299
1.16341	0.40044
2.02185	0.35365
2.15886	0.33791
1.35198	0.19935
1.54172	0.30875
2.88119	0.22143
3.82139	0.20367
3.21331	0.25701
4.1622	0.17667
2.70871	0.17191
2.7105	0.34366
1.98484	0.37135
1.85014	0.503
1.81827	0.52907
2.12466	0.68765
3.41051	0.53574
3.60283	0.35497
2.75205	0.27642
1.6026	0.10664
1.42714	0.22355
4.14699	0.27798
2.63706	0.35872
3.67126	0.34876
1.84402	0.27343
2.30598	0.25624
1.53936	0.14049
2.3643	0.3941
1.8507	0.50015
2.06071	0.63893
1.46847	0.96968
1.74063	0.71531
2.83292	0.36981
3.66158	0.33383
3.72781	0.26384
3.41734	0.10092
4.59923	0.12755
2.61358	0.2913
2.82921	0.35974
1.51775	0.2259
1.4632	0.23523
1.64752	0.29043
2.38402	0.35774
1.09088	0.31718
1.46731	0.27585
1.68773	0.29801
1.61789	0.45953
2.18825	0.26897
2.11515	0.21166
1.68905	0.31559
3.37655	0.34606
4.08652	0.30105
3.37646	0.4049
3.09066	0.36167
1.96888	0.44186
1.39626	0.6915
2.04509	0.7163
2.56462	0.52215
1.58229	0.45676
1.56032	0.41791
1.39458	0.12328
1.52653	0.22103
1.91337	0.46495
2.17986	0.34798
1.49727	0.47999
1.25475	0.48334
2.26337	0.56883
2.58684	0.21926
2.65758	0.3544
2.25696	0.65408
2.15421	0.86854
0.76199	0.34555
1.85352	0.39081
2.40089	0.42203
2.09367	0.31025
2.24275	0.37111
2.7971	0.25557
1.19426	0.29816
0.62318	0.19431
0.76576	0.22675
2.63638	0.38749
2.24593	0.37583
2.61869	0.72934
4.18852	0.76492
2.19048	0.47122
1.95479	0.29585
0.74392	0.41793
0.94359	0.44576
2.16743	0.40559
3.12633	0.32245
2.35897	0.33136
1.65157	0.33134
0.88269	0.31142
2.14385	0.2904
1.98716	0.26425
3.0435	0.28166
2.03572	0.28885
2.05035	0.30911
2.24316	0.35308
0.89329	0.31675
0.73004	0.25809
1.59371	0.28305
2.11874	0.32311
1.61573	0.31694
1.61887	0.31626
0.60227	0.31737
1.2115	0.38219
1.8405	0.34291
2.3189	0.32518
2.65419	0.173
2.82634	0.23458
1.89281	0.37802
2.04872	0.44602
1.59578	0.42176
0.53561	0.42915
1.13738	1.01038
1.31982	0.71839
1.32804	0.63937
1.18845	0.70718
2.4157	0.78953
3.72471	0.80062
1.88421	0.40164
1.73663	0.38308
1.81331	0.50391
1.48307	0.58284
1.9416	0.48053
1.1692	0.4798
1.3751	0.40955
1.21821	0.65483
0.88661	0.66421
1.12736	0.51961
1.15878	0.55968
1.38366	0.36557
1.62679	0.56199
1.95439	0.15542
2.50867	0.12611
1.56408	0.16223
1.6163	0.156
2.19194	0.15306
1.91112	0.20104
1.87635	0.11914
1.69477	0.10746
1.06436	0.10888
0.99647	0.1442
0.81283	0.16973
0.82629	0.16875
1.02168	0.12443
1.3463	0.11805
1.593	0.13737
2.12269	0.11369
2.20268	0.13429
1.79304	0.15018
1.65965	0.12786
1.60189	0.15765
3.2273	0.15427
1.71361	0.14145
1.6527	0.13705
1.4748	0.13398
1.27425	0.19062
1.06502	0.1633
1.15359	0.14262
0.93212	0.14037
1.1685	0.12864
1.20763	0.1347
1.13723	0.13101
1.42582	0.14158
1.70753	0.15224
1.62405	0.15891
2.04862	0.19093
1.53581	0.1454
1.2123	0.15635
1.5442	0.1255
1.11331	0.15579
1.17686	0.15727
1.27313	0.13978
0.93571	0.17188
1.0193	0.16563
1.37047	0.12427
1.00757	0.14121
0.79086	0.12047
1.02428	0.14024
1.30186	0.158
1.53157	0.17698
1.999	0.12324
1.59898	0.10873
3.70682	0.13598
2.55896	0.12649
2.84009	0.12893
3.85246	0.12562
2.55191	0.15458
2.19485	0.15223
2.0678	0.13206
2.93154	0.27128
1.88737	0.12789
1.78514	0.1258
3.0311	0.1464
4.37576	0.13095
3.16486	0.15407
3.11372	0.18321
2.4752	0.14518
1.88451	0.20962
2.53097	0.27947
2.15084	0.13776
5.97007	0.129
3.17443	0.21116
2.08848	0.20343
1.73183	0.18052
2.06049	0.14762
1.3191	0.16435
1.56652	0.12875
1.66799	0.16384
1.82249	0.1988
2.90982	0.16442
2.01988	0.22859
2.62564	0.18945
2.07388	0.21543
1.9612	0.22877
2.39306	0.17454
2.68638	0.15826
1.82041	0.14429
1.61323	0.14394
1.95585	0.19057
1.58808	0.34258
1.04596	0.18772
1.34643	0.16841
1.62941	0.19885
1.56025	0.26874
1.37694	0.30538
3.42239	0.17164
2.76753	0.18949
1.78894	0.14935
3.21775	0.19588
2.72431	0.22358
1.7674	0.21784
1.43634	0.2645
1.4268	0.13245
1.23956	0.15298
1.82109	0.18918
1.62813	0.18469
3.48985	0.20322
4.50891	0.20514
4.49392	0.24684
3.61979	0.14096
3.38645	0.17017
2.87033	0.14276
3.42023	0.1256
2.66697	0.16147
3.10772	0.16136
2.10837	0.15281
3.92882	0.12328
3.37795	0.11904
2.79118	0.13539
2.82789	0.13775
2.64106	0.13245
1.71575	0.11422
1.87039	0.10347
3.42776	0.13567
4.00448	0.13208
3.58274	0.09682
2.93956	0.1218
3.66482	0.09925
2.87101	0.13853
2.90463	0.14627
1.96116	0.09954
3.38421	0.1269
4.46697	0.12396
3.75962	0.11814
3.57586	0.12215
3.59083	0.15305
2.85465	0.16623
2.10663	0.13232
3.17394	0.13119
3.14608	0.11042
2.55565	0.11424
2.70873	0.12857
2.89967	0.11802
3.26429	0.15875
3.1085	0.14705
2.46857	0.13361
2.44644	0.09413
3.26726	0.13251
2.71376	0.12488
1.93421	0.11861
2.18133	0.12279
3.02734	0.11865
2.91904	0.11354
3.57115	0.13382
2.92223	0.13298
4.08759	0.15186
2.01192	0.13216
2.79861	0.13809
3.02965	0.14518
2.66613	0.12325
3.35961	0.15495
2.6738	0.13862
1.89951	0.14676
2.47145	0.14086
2.37586	0.13002
2.76874	0.37021
2.34837	0.16935
1.99704	0.12874
2.3001	0.23492
2.23767	0.13786
1.10059	0.13777
0.6995	0.42071
0.90997	0.26163
0.9348	0.20195
0.90204	0.16304
0.88228	0.14723
0.94752	0.14217
0.9462	0.19692
1.10834	0.2903
1.08834	0.19115
0.80136	0.11364
0.85961	0.13277
0.88617	0.14913
0.81431	0.15608
0.57857	0.15016
0.76712	0.13486
0.57938	0.13869
0.83751	0.15214
0.8658	0.15535
0.92705	0.25597
0.90133	0.63832
1.4274	0.2042
1.14907	0.12086
1.18389	0.15926
1.14166	0.12846
1.13608	0.14315
1.12924	0.07903
0.92429	0.09922
0.924	0.11268
0.83283	0.12047
0.88371	0.23035
0.58258	0.28278
0.74127	0.20045
0.82734	0.10364
0.84337	0.10334
1.20322	0.10234
1.02212	0.13998
1.14079	0.17105
0.98356	1.17645
1.05504	1.05314
0.91582	0.59087
0.82906	1.03353
0.81017	0.62811
0.75598	0.79004
0.85661	0.76287
0.86526	0.73019
0.83468	1.18052
0.79024	0.88918
0.97495	1.11128
0.87755	1.18415
0.81752	0.86942
0.64374	0.97603
0.77003	1.09409
0.68641	0.92532
0.60855	1.19317
0.44744	1.04371
1.8876	1.21183
0.81416	0.79569
1.64937	0.58291
2.0567	1.21217
2.32186	0.98553
1.38082	1.05357
1.63012	0.86735
3.23208	1.48155
6.22698	0.82842
1.92318	2.1235
1.53744	1.37451
2.27608	0.91159
1.70946	2.60669
1.14936	1.06829
0.90993	1.44928
2.08105	1.18927
2.25372	1.64769
1.31179	0.91961
0.94772	0.66519
1.77251	1.02979
2.78984	1.02086
1.8441	2.94321
2.17948	3.67386
5.99771	5.94364
7.26278	3.03603
2.47472	1.57562
2.28265	1.8459
2.78198	1.06506
1.61917	0.88387
1.06172	0.67588
1.58146	0.64863
2.72993	1.08711
3.54558	1.23142
2.57567	1.58582
1.42299	0.58222
1.70734	1.10587
2.63309	2.97613
2.72931	1.98167
2.31348	2.01778
5.99534	1.68568
3.82486	1.16665
2.68805	0.5261
3.31627	1.2931
2.2542	0.45534
1.92699	0.42811
1.89941	0.82841
2.8684	1.38633
3.99571	1.37169
3.7741	1.22257
2.36004	0.44706
2.49022	0.51622
1.95787	1.12829
3.2516	1.47198
2.36179	2.45588
4.48945	2.23344
3.91709	2.94272
3.51405	2.64379
2.93627	1.73687
1.73648	0.9245
2.39751	1.72702
2.43831	1.77795
2.4907	3.12827
3.23327	2.39204
3.67316	1.51559
0.42305	2.63604
2.66566	2.55201
1.5048	2.53966
3.4245	1.91518
1.10856	3.96722
1.21795	1.43537
1.29354	1.40036
1.68676	0.29876
3.66049	1.09518
1.45822	0.73293
2.59057	1.21699
0.29971	1.08921
0.2764	2.28415
0.28124	1.78234
0.27553	1.19843
1.66764	1.42711
2.15255	1.99245
1.77039	1.56022
1.42663	1.71435
1.20748	1.47699
1.43463	1.85569
0.90811	1.25717
1.42503	1.24915
1.97434	1.21469
0.24869	1.07143
0.27946	1.16927
0.30645	1.363
0.31456	1.62319
0.29682	1.88012
0.26777	1.6329
0.35469	1.75763
1.25771	1.6965
2.08801	0.76243
1.4296	1.67647
1.13726	1.91984
1.1155	1.85253
1.10663	2.35544
2.46614	1.24086
0.67092	1.05832
0.23882	1.05021
0.29846	1.05215
0.3206	1.52022
0.32403	2.01115
0.30912	2.65209
0.25853	2.03686
0.23461	1.19655
2.14804	0.97958
1.10288	0.87271
1.17358	1.15907
1.0671	0.92073
0.98451	0.62626
1.07856	2.092
1.30868	1.70346
0.25276	3.43008
0.29575	1.75172
0.30037	1.25304
0.3338	1.09708
0.6792	2.72522
0.62659	1.80733
0.52654	1.32171
2.49585	0.89752
2.03766	0.93029
1.25831	1.46528
3.30735	1.78846
2.63173	1.53598
1.34951	0.97428
1.281	1.62102
3.08555	2.255
1.5725	2.61803
1.01411	0.07687
1.12026	0.0481
0.7359	0.05239
1.27526	0.05367
2.30839	0.04494
1.72261	0.0393
3.16775	0.05635
3.9442	0.06004
5.74896	0.05721
1.32002	0.07212
1.21903	0.07049
2.38727	0.05441
1.16537	0.04409
0.98711	0.06426
0.85276	0.07621
2.83873	0.07404
1.80683	0.05876
4.10794	0.06047
5.97932	0.042
5.18902	0.04053
6.18478	0.06865
7.59643	0.06877
3.11253	0.05149
1.09657	0.0384
2.9432	0.04106
4.31423	0.04974
4.07274	0.05465
3.59111	0.07548
2.26529	0.06428
4.66476	0.04169
8.61043	0.05463
6.19471	0.0672
4.2106	0.06248
5.19362	0.05228
1.47136	0.06194
1.15731	0.07845
1.4817	0.06639
1.44138	0.05398
1.39776	0.04936
1.18397	0.03492
0.94883	0.05007
2.29223	0.05325
2.76539	0.05652
2.26829	0.09878
1.43217	0.0637
1.73107	0.05713
1.13015	0.05248
2.14652	0.08399
3.42948	0.07924
3.3622	0.07385
2.56763	0.05987
2.24442	0.17351
2.4208	0.22936
3.01213	0.2255
1.98799	0.15036
2.25928	0.15328
2.9216	0.04401
1.43221	0.06005
2.33023	0.0643
2.07768	0.07442
2.58092	0.06834
1.97318	0.11547
1.76633	0.10662
1.7942	0.07947
2.84872	0.07515
2.57712	0.07845
2.35734	0.08438
2.60567	0.04937
2.42424	0.05114
2.01969	0.03668
2.36392	0.05084
2.61962	0.07207
3.02077	0.07531
3.42677	0.05994
1.79045	0.07583
4.50293	0.08093
2.14987	0.07116
2.45587	0.07968
1.35079	0.08877
1.71791	0.08579
2.25574	0.08653
2.46033	0.09526
1.8697	0.08888
1.34845	0.08334
2.27351	0.08582
2.22056	0.06548
9.07673	0.05979
10.4929	0.06094
7.66056	0.05933
8.97167	0.07473
9.45392	0.07642
9.8541	0.14355
7.50659	0.13783
6.59193	0.07644
3.51504	0.08725
5.45355	0.10136
6.04484	0.07643
8.52639	0.07254
8.37545	0.32346
10.6739	0.12772
8.44775	0.13279
7.1846	0.10763
8.1282	0.09305
7.22463	0.0664
9.77945	0.11575
8.4152	0.13041
7.83782	0.17016
7.70403	0.21373
7.34811	0.38953
8.09469	0.19335
6.19881	0.18812
7.53234	0.11647
7.90478	0.10626
8.3005	0.08342
8.75837	0.10757
9.13359	0.13618
10.4304	0.14603
10.0008	0.21676
10.8934	0.42336
8.70825	0.29861
6.80641	0.18146
6.88579	0.15446
7.69499	0.1303
6.10379	0.11469
5.09383	0.12726
4.7331	0.14355
5.35517	0.15253
6.5551	0.12511
6.71226	0.17425
7.7094	0.15825
7.01679	0.19236
6.40382	0.21112
8.10852	0.29904
8.978	0.64272
8.27401	0.3638
6.6852	0.2206
4.43609	0.17881
4.52288	0.16887
6.31157	0.13572
2.133	0.1722
3.52482	0.1672
2.98952	0.14251
3.88929	0.1558
4.01178	0.15466
4.10265	0.18249
3.84991	0.32154
4.02732	0.13171
3.10839	0.20678
3.88215	0.26354
3.95669	0.37285
4.27634	0.34013
3.91597	0.14992
3.29986	0.17398
2.75046	0.13686
2.47339	0.14535
1.92898	0.11807
1.89903	0.15217
2.30765	0.15089
2.98422	0.13536
3.18222	0.12796
3.05415	0.21324
2.20943	0.25373
2.90414	0.18133
3.10847	0.1571
3.86709	0.17683
3.8199	0.22726
3.80045	0.16673
1.62521	0.16514
1.19798	0.1427
1.5406	0.10399
1.80537	0.10791
2.18012	0.1045
2.37082	0.11616
3.31181	0.15586
3.54098	0.24022
3.03717	0.18766
1.78383	0.23346
5.16924	0.26717
5.35536	0.25296
7.90158	0.22354
9.10873	0.21474
8.67368	0.26623
8.53191	0.22089
8.71122	0.25419
9.56954	0.18503
8.22164	0.1456
9.2489	0.11105
8.61567	0.0927
6.84629	0.23717
8.36139	0.34689
6.27403	0.34718
5.54483	0.18982
4.61115	0.33647
4.815	0.36055
4.67592	0.32961
5.35928	0.43698
7.43587	0.52274
6.34591	0.51182
6.00127	0.4907
6.09022	0.62003
7.33574	0.1544
4.35513	0.25761
5.06753	0.30238
6.31495	0.2426
6.69818	0.16441
6.47406	0.40634
4.96178	0.38293
4.4856	0.3028
5.06881	0.32049
6.33156	0.33287
4.40607	0.29446
4.61471	0.33502
5.32784	0.37782
5.86738	0.37147
5.21642	0.26918
3.64915	0.43901
3.65221	0.45314
3.9961	0.26607
3.41505	0.24701
3.5706	0.3906
5.09058	0.22767
4.66845	0.26314
4.34548	0.37966
4.55511	0.49998
4.11083	0.47217
5.56808	0.38511
4.43063	0.04182
4.20609	0.05986
4.14186	0.06937
3.80806	0.07543
3.24926	0.08515
2.51199	0.06602
3.18927	0.06208
2.87778	0.06433
2.82474	0.05581
2.43954	0.04886
1.96855	0.05365
3.26427	0.0559
4.2562	0.04234
4.77978	0.03726
3.58755	0.04472
5.43976	0.04672
6.88411	0.05097
6.90658	0.06206
4.33391	0.0334
5.70665	0.04733
4.80061	0.21276
4.08532	0.0955
3.27754	0.09512
4.12062	0.1101
4.33039	0.11417
4.04905	0.11169
5.13677	0.17701
4.86714	0.13824
4.88136	0.10921
5.47138	0.1079
5.30175	0.10761
5.42757	0.07327
4.72592	0.06869
5.32865	0.06946
4.30769	0.07819
4.0358	0.12572
4.6963	0.13383
3.48163	0.1376
2.93952	0.13151
3.42632	0.11535
3.02665	0.10715
3.62945	0.08117
4.18371	0.07368
4.24634	0.07982
4.34418	0.09861
4.35043	0.12709
4.17518	0.09312
3.92628	0.08073
3.04456	0.07703
3.21841	0.07449
3.15162	0.09079
2.88103	0.10263
1.4061	0.11016
2.61632	0.10514
2.20749	0.11676
1.83796	0.10622
2.05541	0.1145
2.24487	0.07018
2.90948	0.13394
2.95209	0.10489
2.85496	0.08858
2.71815	0.08932
2.83821	0.11982
2.58617	0.05981
2.10768	0.06494
2.46498	0.07818
2.68906	0.08444
2.37838	0.11114
2.17072	0.16835
2.41358	0.09838
1.54424	0.11143
1.66511	0.12454
1.74591	0.1771
1.81119	0.17003
1.96231	0.22059
2.13206	0.50874
1.61869	0.56189
1.82729	0.61389
1.96031	0.53879
2.9619	0.50275
3.92635	0.26565
3.99505	0.22046
3.00593	0.24897
3.13721	0.27208
2.60753	0.20578
2.25159	0.18746
2.64815	0.16494
4.43046	0.18926
5.46903	0.25759
4.15813	0.22163
4.71128	0.21254
3.74662	0.19242
4.16838	0.26549
3.969	0.35097
4.33966	0.41096
3.68201	0.22871
4.2754	0.21823
4.91832	0.16299
5.26443	0.16735
5.86995	0.17059
5.2823	0.12575
6.03988	0.09084
5.6072	0.10808
5.48678	0.14575
4.23706	0.0489
4.92972	0.0475
5.24625	0.0445
7.49877	0.0291
4.72922	0.39452
5.82706	0.22555
4.07866	0.36302
3.90235	0.3871
3.58754	0.4887
4.02908	0.44439
4.71368	0.81418
3.94881	0.31337
4.49936	0.24972
5.17034	0.55675
4.8494	0.58178
5.16009	0.59503
5.75295	0.62235
4.87931	0.49341
4.78621	0.67247
4.49161	0.64262
3.86508	0.51567
4.06841	0.48466
4.53831	0.54726
3.34858	0.60309
3.94894	0.59283
4.08455	0.61996
4.06906	0.62898
1.24457	0.59097
5.71805	0.34933
5.20036	0.45704
8.85656	0.49906
6.50415	0.45406
6.13042	0.31786
5.94912	0.17935
7.62693	0.2889
6.2718	0.65084
6.59784	0.60958
4.75961	0.54413
3.7647	0.53114
0.32559	0.41678
0.2347	0.52786
0.21256	0.78388
0.11095	0.46884
0.11711	0.23872
0.1456	0.15498
0.1153	0.14664
0.16449	0.15032
0.18559	0.11755
0.18342	0.11646
0.20825	0.12033
0.31458	0.13064
0.23417	0.12192
0.12019	0.19738
0.12119	0.33819
0.14101	0.95739
0.11066	1.44851
0.25678	0.87818
0.32831	0.41562
0.284	0.16556
0.35415	0.20871
0.21217	0.12974
0.27644	0.13101
0.27839	0.10259
0.12128	0.11371
0.32985	0.14293
0.41582	0.19181
0.33133	0.24766
0.24466	0.20862
0.22681	0.17472
0.19224	0.09252
0.17196	0.11906
0.13106	0.13097
0.26384	0.12278
0.2846	0.10763
0.36282	0.13482
0.3629	0.20231
0.43109	0.27242
0.42712	0.22535
0.43144	0.15902
0.38961	0.10046
0.41336	0.0974
0.24449	0.11373
0.22966	0.12109
0.24304	0.11232
0.16273	0.12884
0.27662	0.12729
0.30214	0.12521
0.29766	0.11263
0.36069	0.10057
0.48976	0.20262
0.51895	0.0986
0.41775	0.09932
0.49278	0.07851
0.49401	0.07393
0.39327	0.08033
0.29874	0.09258
0.30043	0.10056
0.29771	0.08231
0.24136	0.08638
0.30679	0.10309
0.31498	0.08858
0.38899	0.07196
0.48855	0.09374
0.50438	0.11828
0.52612	0.10501
0.33491	0.11846
0.38302	0.10663
0.34757	0.10546
0.3372	0.07225
0.23175	0.13149
0.24366	0.14188
0.19932	0.11242
0.23607	0.08444
0.32001	0.09203
0.38663	0.0943
0.43532	0.09926
0.57293	0.07579
0.55787	0.08696
0.30037	0.0934
0.27109	0.12883
0.29285	0.13827
0.2867	0.1465
0.31748	0.12022
0.29325	0.11767
0.26704	0.11489
0.23687	0.13669
0.2674	0.12119
0.30913	0.10648
0.31228	0.49304
0.34717	0.50242
0.25378	0.50915
0.30633	0.44604
0.31136	0.33712
0.29113	0.11842
0.34892	0.07576
0.35273	0.07678
0.35579	0.06142
0.33031	0.06933
0.34848	0.07389
0.37553	0.08955
0.32057	0.11189
0.29754	0.16993
0.30736	0.15877
0.35081	0.1285
0.35766	0.07097
0.33611	0.14959
0.36921	0.18125
0.39401	0.15313
0.34308	0.11982
0.31198	0.11508
0.30889	0.10746
0.34322	0.10193
0.35324	0.10188
0.35501	0.10152
0.32708	0.10636
0.34044	0.08988
0.39577	0.10665
0.28437	0.11272
0.31115	0.15401
0.37497	0.15941
0.38994	0.17571
0.45309	0.14917
0.38244	0.18157
0.37911	0.20867
0.38435	0.1854
0.32325	0.16708
0.29549	0.13292
0.33174	0.10076
0.36533	0.11281
0.38014	0.11048
0.4099	0.10253
0.47449	0.09443
0.43486	0.11713
0.27664	0.10908
0.28752	0.13007
0.27747	0.13009
0.36134	0.12718
0.33	0.13159
0.33766	0.14027
0.347	0.15062
0.28557	0.13968
0.36273	0.1583
1.2112	0.14187
0.74393	0.18575
0.83417	0.17077
0.57118	0.17859
0.38399	0.04926
0.41148	0.05984
0.20869	0.0634
0.2782	0.05116
0.48221	0.07944
0.63881	0.07606
0.80952	0.07098
0.85271	0.06047
0.75388	0.06696
0.54131	0.08814
0.56685	0.07801
0.85661	0.06589
0.66668	0.03962
0.5691	0.05459
1.03	0.07003
1.22186	0.0675
1.12674	0.07205
0.66964	0.07033
0.73093	0.04565
1.2682	0.07302
1.02487	0.05885
0.96954	0.06866
0.51218	0.06331
0.40513	0.06914
0.26228	0.07279
0.21631	0.082
0.27192	0.07906
0.23008	0.08963
1.46628	0.09299
1.67173	0.08992
1.77573	0.07831
2.25429	0.06926
1.801	0.05929
1.57	0.06162
1.88699	0.07385
1.37737	0.07738
1.35891	0.09239
0.82467	0.09361
0.59589	0.08672
0.29015	0.30692
0.30779	0.28754
0.19078	0.22575
0.35187	0.08572
0.49389	0.08582
0.65622	0.0967
1.07733	0.13711
1.08691	0.14329
1.48708	0.11115
0.73842	0.17982
0.18092	0.16613
0.16511	0.2502
0.16139	0.11664
0.18666	0.17821
0.14682	0.16008
0.12544	0.21274
0.1418	0.11702
0.1697	0.08904
0.17105	0.10314
0.20515	0.13496
0.2091	0.12836
0.18031	0.17989
0.20103	0.21024
0.20445	0.20716
0.20171	0.21717
0.24131	0.14417
0.20076	0.16884
0.2027	0.12512
0.20398	0.14398
0.2015	0.12236
0.15648	0.07389
0.17459	0.06639
0.17245	0.12921
0.16782	0.11726
0.19217	0.1141
0.2235	0.13598
0.21926	0.15539
0.21299	0.18054
0.24028	0.21202
0.224	0.18067
0.23602	0.1473
0.24575	0.15543
0.22967	0.12597
0.23774	0.11261
0.23842	0.13018
0.20582	0.11288
0.17677	0.09654
0.18374	0.11751
0.194	0.09852
0.19807	0.12156
0.2318	0.13221
0.23983	0.06999
0.22262	0.19198
0.22441	0.48102
0.24898	0.31864
0.25874	0.29361
0.22853	0.19198
0.26281	0.2625
0.24927	0.30177
0.25608	0.28067
0.23332	0.39131
0.2147	0.36095
0.20014	0.28988
0.21487	0.34533
0.20573	0.5119
0.2247	0.41821
0.20647	0.29356
0.26137	0.20968
0.2724	0.24313
0.25472	0.26814
0.24828	0.31318
0.28378	0.23479
0.13206	0.2138
0.13863	0.28797
0.12023	0.43157
0.13076	0.51104
0.09642	0.25006
0.13391	0.28084
0.13809	0.32514
0.14848	0.26472
0.11939	0.36809
0.13122	0.30517
0.15605	0.30391
0.13827	0.35014
0.16488	0.32571
0.15545	0.25268
0.13795	0.33872
0.14333	0.28401
0.19672	0.36723
0.18494	0.60611
0.14847	0.68502
0.15428	0.48377
0.14818	0.28623
0.15056	0.29675
0.15345	0.39729
0.1677	0.23418
0.16639	0.20309
0.17099	0.28036
0.14002	0.22708
0.13294	0.23754
0.18929	0.24531
0.16585	0.39026
0.17923	0.31877
0.18115	0.31162
0.19732	0.73758
0.17739	0.86394
0.17229	0.809
0.18093	0.60296
0.1657	0.50004
0.15015	0.36244
0.14904	0.43751
0.20195	0.20083
0.22174	0.22101
0.12797	0.2139
0.19792	0.1849
0.18394	0.25479
0.33745	0.23109
0.40484	0.27365
0.38605	0.17842
0.3447	0.16015
0.42214	0.13438
0.44785	0.18734
0.37258	0.23368
0.31873	0.16564
0.30466	0.17531
0.40051	0.14248
0.42474	0.13281
0.43401	0.15968
0.40501	0.15429
0.39033	0.12703
0.40801	0.0766
0.34963	0.16157
0.38629	0.27766
0.40965	0.17253
0.44477	0.17772
0.49729	0.19113
0.45983	0.20149
0.42089	0.22738
0.39585	0.22885
0.31897	0.21405
0.36212	0.19094
0.4286	0.15814
0.46378	0.19058
0.47358	0.21345
0.46358	0.14514
0.42419	0.37833
0.36198	0.4413
0.35401	0.3837
0.37467	0.35361
0.38176	0.25606
0.43907	0.20349
0.4777	0.20567
0.48838	0.24672
0.42456	0.31388
0.41632	0.22687
0.33797	0.40369
0.39919	0.38833
0.43	0.20425
0.47768	0.2117
0.53378	0.12352
0.5191	0.07498
0.41314	0.19587
0.39712	0.1702
0.33991	0.13463
0.42717	4.31933
0.45094	4.32577
0.45561	5.93963
0.53926	6.31848
0.53924	2.80696
0.57613	4.72871
0.48977	6.77451
0.35772	4.78324
0.45713	5.72866
0.44083	7.04727
0.61342	6.95678
[truncated: 977 more rows]
