# Supplementary material for: Tumor stiffening reversion through collagen crosslinking inhibition improves T cell migration and anti-PD-1 treatment
Source: eLife. 2021 Jun 9;10:e58688. doi: 10.7554/eLife.58688 (PMC8203293; doi:10.7554/eLife.58688)
Supplement: Figure 5—source data 1. [file elife-58688-fig5-data1.xlsx]

## Sheet: Figure 5
	Migration Speed			Cell displacement			Trajectory Straightness
	EGI-1			EGI-1			EGI-1
	Control	BAPN		Control	BAPN		Control	BAPN
Number of values	370	242		428	242		428	241
Minimum	0.242	0.09031		0.4506	0.1356		0.01842	0.05681
25% Percentile	1.138	1.207		5.389	8.222		0.2326	0.3435
Median	1.925	1.639		10.21	13.23		0.3697	0.5495
75% Percentile	3.233	2.236		16.83	20.91		0.5136	0.7767
Maximum	10.94	8.112		51.11	61.87		1	1
Mean	2.342	1.907		12.11	15.38		0.3914	0.5555
Std. Deviation	1.579	1.178		8.45	10.42		0.1999	0.2522
Std. Error	0.0821	0.0757		0.4085	0.6701		0.009664	0.01625
Lower 95% CI of mean	2.18	1.758		11.31	14.06		0.3724	0.5235
Upper 95% CI of mean	2.503	2.056		12.91	16.7		0.4104	0.5875
Sum	866.4	461.4		5182	3722		167.5	133.9
Mann Whitney test
P value	0.0543			< 0,0001			< 0,0001
Exact or approximate P value?	Gaussian Approximation			Gaussian Approximation			Gaussian Approximation
P value summary	ns			***			***
Are medians signif. different? (P < 0.05)	No			Yes			Yes
One- or two-tailed P value?	Two-tailed			Two-tailed			Two-tailed
Sum of ranks in column A,B	119520 , 68059			133491 , 91295			124184 , 99932
Mann-Whitney U	38656			41685			32378
	KPC			KPC			KPC
	Control	BAPN		Control	BAPN		Control	BAPN
Number of values	414	1128		785	2006		191	415
Minimum	0.463	0.3804		0.3474	0		0.01853	0.01465
25% Percentile	1.677	1.862		4.358	5.825		0.1972	0.2115
Median	2.804	3.066		7.52	11.2		0.3414	0.3667
75% Percentile	5.023	5.293		13.71	19.18		0.5508	0.5563
Maximum	21.27	22.74		94.06	85.72		0.9969	1
Mean	3.696	3.925		10.79	14.17		0.4002	0.4089
Std. Deviation	2.906	2.934		10.38	11.46		0.2532	0.2409
Std. Error	0.1428	0.08737		0.3705	0.2559		0.01832	0.01182
Lower 95% CI of mean	3.415	3.754		10.06	13.67		0.364	0.3857
Upper 95% CI of mean	3.976	4.097		11.52	14.67		0.4363	0.4322
Sum	1530	4428		8471	28422		76.43	169.7
Mann Whitney test
P value	0.0553			< 0,0001			0.4823
Exact or approximate P value?	Gaussian Approximation			Gaussian Approximation			Gaussian Approximation
P value summary	ns			***			ns
Are medians signif. different? (P < 0.05)	No			Yes			No
One- or two-tailed P value?	Two-tailed			Two-tailed			Two-tailed
Sum of ranks in column A,B	304547 , 885106			927739 , 2,968e+006			56561 , 127360
Mann-Whitney U	218642			619234			38225
	MMTV-PyMT			MMTV-PyMT			MMTV-PyMT
	Control	BAPN		Control	BAPN		Control	BAPN
Number of values	1072	538		1072	538		1072	538
Minimum	0.1648	0.4321		0.01337	0.04583		0.0005237	0.01141
25% Percentile	2.571	2.235		5.462	6.265		0.2047	0.2084
Median	3.806	3.756		10.37	12.23		0.3439	0.3603
75% Percentile	5.038	5.175		17.99	22.61		0.5525	0.5632
Maximum	25.9	20.28		85.45	116.7		1	1
Mean	4.031	3.957		13.15	17.21		0.403	0.4014
Std. Deviation	2.217	2.356		10.88	15.96		0.2518	0.2402
Std. Error	0.06773	0.1016		0.3322	0.6881		0.00769	0.01036
Lower 95% CI of mean	3.899	3.757		12.5	15.85		0.3879	0.381
Upper 95% CI of mean	4.164	4.156		13.8	18.56		0.4181	0.4217
Sum	4322	2129		14099	9256		432	215.9
Mann Whitney test
P value	0.4115			< 0,0001			0.7979
Exact or approximate P value?	Gaussian Approximation			Gaussian Approximation			Gaussian Approximation
P value summary	ns			***			ns
Are medians signif. different? (P < 0.05)	No			Yes			No
One- or two-tailed P value?	Two-tailed			Two-tailed			Two-tailed
Sum of ranks in column A,B	870723 , 426132			827283 , 469573			861243 , 435613
Mann-Whitney U	281141			252155			286115
	mPDAC			mPDAC			mPDAC
	Control	BAPN		Control	BAPN		Control	BAPN
Number of values	44	13		44	15		44	13
Minimum	0.1041	0.3423		0.2216	2.502		0.02233	0.1361
25% Percentile	0.5897	0.9691		0.9892	7.766		0.08813	0.2766
Median	0.888	1.309		1.915	11.67		0.1243	0.4195
75% Percentile	1.35	2.438		2.67	13.84		0.2091	0.714
Maximum	2.484	3.084		8.504	23.52		0.9928	0.9385
Mean	1.016	1.605		2.036	11.87		0.1788	0.4918
Std. Deviation	0.5471	0.883		1.416	6.089		0.1764	0.269
Std. Error	0.08248	0.2449		0.2134	1.572		0.0266	0.07459
Lower 95% CI of mean	0.8495	1.071		1.605	8.494		0.1251	0.3293
Upper 95% CI of mean	1.182	2.138		2.466	15.24		0.2324	0.6543
Sum	44.7	20.86		89.58	178		7.866	6.393
Mann Whitney test
P value	0.0188			< 0,0001			0.0158
Exact or approximate P value?	Gaussian Approximation			Gaussian Approximation			Gaussian Approximation
P value summary	*			***			*
Are medians signif. different? (P < 0.05)	Yes			Yes			Yes
One- or two-tailed P value?	Two-tailed			Two-tailed			Two-tailed
Sum of ranks in column A,B	1152 , 501			1011 , 759			1047 , 606
Mann-Whitney U	162			21			13
