# Supplementary material for: Tumor stiffening reversion through collagen crosslinking inhibition improves T cell migration and anti-PD-1 treatment
Source: eLife. 2021 Jun 9;10:e58688. doi: 10.7554/eLife.58688 (PMC8203293; doi:10.7554/eLife.58688)
Supplement: Figure 6—source data 1. [file elife-58688-fig6-data1.xlsx]

## Sheet: Figure 6A
EGI-1				KPC				MMTV-PyMT				MMTV-PyMT
Control		BAPN		Control		BAPN		Control		BAPN		Control		BAPN
Stiffness	T cell migration speed	Stiffness	T cell migration speed	Stiffness	T cell migration speed	Stiffness	T cell migration speed	Stiffness	T cell migration speed	Stiffness	T cell migration speed	Stiffness	T cell migration speed	Stiffness	T cell migration speed
16.7	4.16	5.71	5.24	48.4	3.947	18.9	3.629	10.6	3.7022	23.7	1.95301	9.1	1.10006	5.4	2.54405
11.3	4.03	9.45	4.37	54.3	3.725	12.4	5.736	18.6	4.03746	16	2.85187	15.6	0.662611	6.1	1.43208
16	3.48	4.66	4.07	48	1.681	18.7	4.379	18.9	3.90469	14.4	4.25099	10.6	0.880245	4.7	2.11405
24	4.53	8.12	5.68	28.2	3.67	20	3.368	19.6	3.56028	5.2	4.6575	8.7	0.933976	6.5	1.51208
15	3.62	11.8	3.98	32	3.456	13.5	5.6585	13.4	4.847	18.3	3.79614
18.6	3.7	13.4	1.58568	41.5	3.255	17.2	3.32	12.6	4.847	21.5	3.61456
17	1.99425	15.1	1.53424					21.6	2.847	16	4.50338
19.7	3.43431	18.8	1.73043					18.9	3.50469
30.2	2.50268	15.5	2.56395					17.6	3.20469
36.9	2.09238							13.4	3.847
27	2.46476
20.4	1.79441

## Sheet: Figure 6B
EGI-1				KPC				MMTV-PyMT				mPDAC
Control		BAPN		Control		BAPN		Control		BAPN		Control		BAPN
Stiffness	T cell displacement	Stiffness	T cell displacement	Stiffness	T cell displacement	Stiffness	T cell displacement	Stiffness	T cell displacement	Stiffness	T cell displacement	Stiffness	T cell displacement	Stiffness	T cell displacement
16.7	23.7	5.71	37.93	48.4	14.1	18.9	12.34	10.6	14.3431	13.7	19.0279	9.1	2.35986	5.4	10.7053
11.3	18.45	9.45	17.38	54.3	13.25	12.4	21.48	18.6	12.8961	16	14.6962	15.6	1.73859	6.1	8.08158
16	20.57	4.66	26.39	48	9.7	18.7	8.949	18.9	12.174	14.4	15.5348	10.6	6.24314	4.7	9.08158
24	13.17	8.12	33.28	28.2	16.48	20	16.2	19.6	12.4996	5.2	18.1902	8.7	3.04983	6.5	7.70526
15	18.13	11.8	22.08	32	15.5	13.5	18.7	13.4	14.2586	18.3	18.4069
18.6	25.43	13.4	15.5304	41.5	13.86	17.2	19	22.6	12.174	11.5	23.9178
17	9.66118	15.1	12.1701					21.2	13.4996	16	15.6176
19.7	14.5622	18.8	9.8114					14.4	13.2586
30.2	12.9637	15.5	23.2059
36.9	10.4366
27	18.2343
20.4	13.7788
