# Supplementary material for: Tumor stiffening reversion through collagen crosslinking inhibition improves T cell migration and anti-PD-1 treatment
Source: eLife. 2021 Jun 9;10:e58688. doi: 10.7554/eLife.58688 (PMC8203293; doi:10.7554/eLife.58688)
Supplement: Figure 7—source data 1. [file elife-58688-fig7-data1.xlsx]

## Sheet: Figure 7a
Day post treat	Control															anti-PD1																	BAPN																anti PD1 BAPN
0	1	1	1	1	1	1	1	1	1	1	1	1	1	1	1	1	1	1	1	1	1	1	1	1	1	1	1	1	1	1	1	1	1	1	1	1	1	1	1	1	1	1	1	1	1	1	1	1	1
2	0.85833	1.63441	1.73846	2.83108	1.59625	1.06575	0.953077	2.07126											0.938489	1.64553	2.38715	3.20279	1.47899										2.23185	0.98865	2.74247	2.78719	2.02753	1.025	1.9821										2.62763
4											2.98687	4.08665	4.89224	3.375	5.45325														4.93878	7.08769	1.52965	8.61837												2.62144	2.82486	4.13841	3.14843	3.844
7	1.92512	2.27952	2.30291	3.49376	3.46139	0.98865	2.5811	3.74957	5.44825	9.91332	3.81053	7.84	9.87194	13.1061	5.45325	8.959	2.6476	9.09818	1.35115	2.23731	2.55682	6.18583	2.13732	2.93224	3.29836	5.72336	3.57187	3.20349	7.76822	7.93665	1.68321	11.8043	4.93789	2.10248	3.59251	6.20096	3.56484	1.54697	3.16049	3.1804	3.67659	2.48095	2.34464	4.851	3.20133	6.34631	3.69158	6.99622	5.06406
10	3.64634	7.9187	5.19014	13.0934	7.5865	2.725	3.1577	9.91304	18.5703	16.546	13.0781	13.5938	11.9905	20.8148	11.0947	14.792	3.65502	12.1151	4.21871	6.92989	5.84074	10.9616	4.73244	4.78346	7.23808	9.02222	5.05787	6.49979	5.80571	16.163	5.11605	19.6745	7.85467	8.68873	5.65114	12.8034	7.502	4.82496	8.03801	9.02845	5.46807	3.87176	7.42625	18.1585	13.5152	11.0086	5.42992	6.74028	9.06283
13			6.78954	18.9545	8.1254		4.85236	15.9876	25.654	18.9856	20.5874	17.856	15.6985	23.584	12.6579		5.68725	13.5452	10.6687	8.254	8.354	15.6384	4.9562	5.9875	8.69548	9.54863	5.5698	8.36435	10.5486	18.6543	6.94242	21.3464	8.1545	8.05242	10.6547	19.5324	8.6541	5.45463	7.345	10.6547	8.36545	4.32577	8.54345	19.2345	15.4205	12.5454	6.241	7.25744	10.544
17	10.3611	8.27864	8.79856	23.5433	8.98866		6.18908	20.9686	32.3285	20.273	27.6115	21.375	17.1875	27.075	13.9114	20.625	7.81177	15.7865	14.7064	14.501	9.98148	20.0861	5.00926	9.68417	10.6333	10.9349	6.03306	12.3369	14.5539	33.2031	8.1277	25.5	9.76412	7.45243	16.5148	21.5617	12.4324	9.08357	7.70135	13.0575	13.3051	5.87111	14.1663	22.6237	17.3898	14.0389	7.04773	9.66362	14.1617
[truncated: 16 more columns]

## Sheet: Figure 7b
PMN/mg tissu
	Control	anti PD1	BAPN	BAPN anti PD1
Number of values	15	17	12	14
Minimum	151.4	94.68	100.2	69.58
25% Percentile	620.7	193	101.9	117.4
Median	911.9	310.7	222.6	284.1
75% Percentile	1027	501.8	513.7	416.3
Maximum	1960	1401	750.7	511.6
Mean	877.9	395.4	295.5	272.1
Std. Deviation	410.3	307.2	235.1	161.3
Std. Error	105.9	74.5	67.87	43.11
Lower 95% CI of mean	650.7	237.5	146.2	179
Upper 95% CI of mean	1105	553.3	444.9	365.3
Sum	13169	6722	3547	3810
Kruskal-Wallis test
P value	< 0,0001
Exact or approximate P value?	Gaussian Approximation
P value summary	***
Do the medians vary signif. (P < 0.05)	Yes
Number of groups	4
Kruskal-Wallis statistic	22.06
Dunn's Multiple Comparison Test	Difference in rank sum	Significant? P < 0,05?	Summary
Control vs anti PD1	19.42	Yes	**
Control vs BAPN	25.52	Yes	***
Control vs BAPN anti PD1	25.39	Yes	***
anti PD1 vs BAPN	6.093	No	ns
anti PD1 vs BAPN anti PD1	5.962	No	ns
BAPN vs BAPN anti PD1	-0.131	No	ns

## Sheet: Figure 7c
TAM MHCII+/mg tissu
	Control	anti PD1	BAPN	BAPN anti PD1
Number of values	15	11	14	15
Minimum	106.5	315.5	320.5	638.5
25% Percentile	310.9	476.5	869.3	913.9
Median	527.7	590.8	1232	1222
75% Percentile	750.5	1945	2178	1431
Maximum	2555	4061	4979	9171
Mean	665.8	1197	1687	2099
Std. Deviation	600.9	1248	1363	2395
Std. Error	155.1	376.4	364.2	618.3
Lower 95% CI of mean	333.1	358.6	900.2	772.6
Upper 95% CI of mean	998.6	2036	2474	3425
Sum	9988	13170	23617	31481
Kruskal-Wallis test
P value	0.0009
Exact or approximate P value?	Gaussian Approximation
P value summary	***
Do the medians vary signif. (P < 0.05)	Yes
Number of groups	4
Kruskal-Wallis statistic	16.46
Dunn's Multiple Comparison Test	Difference in rank sum	Significant? P < 0,05?	Summary
Control vs anti PD1	-7.455	No	ns
Control vs BAPN	-19.21	Yes	**
Control vs BAPN anti PD1	-20.6	Yes	**
anti PD1 vs BAPN	-11.76	No	ns
anti PD1 vs BAPN anti PD1	-13.15	No	ns
BAPN vs BAPN anti PD1	-1.386	No	ns

## Sheet: Figure 7d
CD8 GrzmB +/mg tissu
	Control	anti PD1	BAPN	BAPN anti PD1
Number of values	13	11	14	16
Minimum	12.67	12.54	7.151	46.51
25% Percentile	33.6	15.43	32.98	100.2
Median	43.01	38.3	48.55	113.8
75% Percentile	50.66	55.98	81.05	135.7
Maximum	55.35	81.74	123.8	233.9
Mean	39.76	39.18	53.94	114.8
Std. Deviation	13.57	21.75	33.48	45
Std. Error	3.763	6.558	8.949	11.25
Lower 95% CI of mean	31.56	24.57	34.6	90.84
Upper 95% CI of mean	47.96	53.79	73.27	138.8
Sum	516.9	431	755.1	1837
Kruskal-Wallis test
P value	< 0,0001
Exact or approximate P value?	Gaussian Approximation
P value summary	***
Do the medians vary signif. (P < 0.05)	Yes
Number of groups	4
Kruskal-Wallis statistic	25.72
Dunn's Multiple Comparison Test	Difference in rank sum	Significant? P < 0,05?	Summary
Control vs anti PD1	0.6608	No	ns
Control vs BAPN	-6.063	No	ns
Control vs BAPN anti PD1	-25.13	Yes	***
anti PD1 vs BAPN	-6.724	No	ns
anti PD1 vs BAPN anti PD1	-25.8	Yes	***
BAPN vs BAPN anti PD1	-19.07	Yes	**

## Sheet: Figure 7e
CD8:Treg
	Control	anti PD1	BAPN	BAPN anti PD1
Number of values	14	12	14	14
Minimum	0.1908	0.2974	0.9385	0.5924
25% Percentile	0.4573	0.4401	1.211	1.498
Median	0.7557	0.8103	1.411	2.91
75% Percentile	1.049	1.171	2.775	3.48
Maximum	1.899	2.904	7.729	6.329
Mean	0.8007	1.015	2.377	2.709
Std. Deviation	0.4598	0.7948	2.078	1.503
Std. Error	0.1229	0.2294	0.5553	0.4016
Lower 95% CI of mean	0.5353	0.51	1.178	1.841
Upper 95% CI of mean	1.066	1.52	3.577	3.577
Sum	11.21	12.18	33.28	37.93
Kruskal-Wallis test
P value	< 0,0001
Exact or approximate P value?	Gaussian Approximation
P value summary	***
Do the medians vary signif. (P < 0.05)	Yes
Number of groups	4
Kruskal-Wallis statistic	23.07
Dunn's Multiple Comparison Test	Difference in rank sum	Significant? P < 0,05?	Summary
Control vs anti PD1	-2.476	No	ns
Control vs BAPN	-19.14	Yes	**
Control vs BAPN anti PD1	-23.64	Yes	***
anti PD1 vs BAPN	-16.67	Yes	*
anti PD1 vs BAPN anti PD1	-21.17	Yes	**
BAPN vs BAPN anti PD1	-4.5	No	ns

## Sheet: Figure 7f
TNF a fold change
	Control	anti PD1	BAPN	BAPN anti PD1
Number of values	7	7	4	12
Minimum	0.8214	0.922	1.511	1.859
25% Percentile	0.9144	1.113	1.518	4.244
Median	1.01	1.305	1.96	8.467
75% Percentile	1.058	10.05	2.995	24.91
Maximum	1.18	18.07	3.199	37.59
Mean	1	5.851	2.158	14.43
Std. Deviation	0.112	6.603	0.8031	13.03
Std. Error	0.04234	2.496	0.4015	3.761
Lower 95% CI of mean	0.8964	-0.2563	0.8799	6.148
Upper 95% CI of mean	1.104	11.96	3.436	22.71
Sum	7	40.95	8.631	173.1

## Sheet: Figure 7g
RANTES fold change
	Control	anti PD1	BAPN	BAPN anti PD1
Number of values	7	7	4	12
Minimum	0.048	0.744	1.668	0.8779
25% Percentile	0.3194	0.7957	1.747	1.332
Median	0.6914	1.736	2.45	3.54
75% Percentile	1.635	3.066	6.939	10.59
Maximum	2.251	3.79	8.279	16.64
Mean	1	1.916	3.712	5.721
Std. Deviation	0.787	1.21	3.091	5.467
Std. Error	0.2975	0.4575	1.545	1.578
Lower 95% CI of mean	0.2721	0.7967	-1.206	2.247
Upper 95% CI of mean	1.728	3.036	8.63	9.195
Sum	7	13.41	14.85	68.65

## Sheet: Figure 7h
GrzmB+ fold change
	Control	anti PD1	BAPN	BAPN anti PD1
Number of values	7	6	4	12
Minimum	0.773	0.7959	2.156	0.6475
25% Percentile	0.8215	0.9783	2.407	1.11
Median	0.943	1.071	4.489	2.555
75% Percentile	1.148	2.719	5.879	6.215
Maximum	1.423	6.966	5.9	10.29
Mean	1	2.041	4.258	3.837
Std. Deviation	0.2239	2.418	1.893	3.206
Std. Error	0.08462	0.9872	0.9466	0.9256
Lower 95% CI of mean	0.7929	-0.4964	1.246	1.8
Upper 95% CI of mean	1.207	4.579	7.271	5.874
Sum	7	12.25	17.03	46.04
